# Supplementary material for: Identifying the predictors of avoidable emergency department attendance after contact with the NHS 111 phone service: analysis of 16.6 million calls to 111 in England in 2015–2017
Source: PubMed Central journal article supplement — BMJ Open. 2020 Mar 9;10(3):e032043. doi: 10.1136/bmjopen-2019-032043 (PMC7066618; doi:10.1136/bmjopen-2019-032043), 2020-03-09
Supplement: bmjopen-2019-032043.draft_revisions.pdf [file bmjopen-2019-032043.draft_revisions.pdf]

# BMJ Open

BMJ Open is committed to open peer review. As part of this commitment we make the peer review history of every article we publish publicly available.

When an article is published we post the peer reviewers' comments and the authors' responses online. We also post the versions of the paper that were used during peer review. These are the versions that the peer review comments apply to.

The versions of the paper that follow are the versions that were submitted during the peer review process. They are not the versions of record or the final published versions. They should not be cited or distributed as the published version of this manuscript.

BMJ Open is an open access journal and the full, final, typeset and author-corrected version of record of the manuscript is available on our site with no access controls, subscription charges or pay-per-view fees (<http://bmjopen.bmj.com>).

If you have any questions on BMJ Open's open peer review process please email [info.bmjopen@bmj.com](mailto:info.bmjopen@bmj.com)

# BMJ Open

## Identifying the predictors of avoidable emergency department attendance after contact with the NHS 111 phone service: Analysis of 16.6 million calls to 111 in England in 2015-17

|                               |                                                                                                                                                                                                                    |
|-------------------------------|--------------------------------------------------------------------------------------------------------------------------------------------------------------------------------------------------------------------|
| Journal:                      | <i>BMJ Open</i>                                                                                                                                                                                                    |
| Manuscript ID                 | bmjopen-2019-032043                                                                                                                                                                                                |
| Article Type:                 | Research                                                                                                                                                                                                           |
| Date Submitted by the Author: | 30-May-2019                                                                                                                                                                                                        |
| Complete List of Authors:     | Egan, Mark; The Behavioural Insights Team, Murar, Filip; The Behavioural Insights Team, Lawrence, James; The Behavioural Insights Team Burd, Hannah; The Behavioural Insights Team                                 |
| Keywords:                     | ACCIDENT & EMERGENCY MEDICINE, HEALTH SERVICES ADMINISTRATION & MANAGEMENT, Organisation of health services < HEALTH SERVICES ADMINISTRATION & MANAGEMENT, Rationing < HEALTH SERVICES ADMINISTRATION & MANAGEMENT |
|                               |                                                                                                                                                                                                                    |

SCHOLARONE™  
Manuscripts

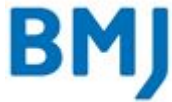

I, the Submitting Author has the right to grant and does grant on behalf of all authors of the Work (as defined in the below author licence), an exclusive licence and/or a non-exclusive licence for contributions from authors who are: i) UK Crown employees; ii) where BMJ has agreed a CC-BY licence shall apply, and/or iii) in accordance with the terms applicable for US Federal Government officers or employees acting as part of their official duties; on a worldwide, perpetual, irrevocable, royalty-free basis to BMJ Publishing Group Ltd ("BMJ") its licensees and where the relevant Journal is co-owned by BMJ to the co-owners of the Journal, to publish the Work in this journal and any other BMJ products and to exploit all rights, as set out in our [licence](#).

The Submitting Author accepts and understands that any supply made under these terms is made by BMJ to the Submitting Author unless you are acting as an employee on behalf of your employer or a postgraduate student of an affiliated institution which is paying any applicable article publishing charge ("APC") for Open Access articles. Where the Submitting Author wishes to make the Work available on an Open Access basis (and intends to pay the relevant APC), the terms of reuse of such Open Access shall be governed by a Creative Commons licence – details of these licences and which [Creative Commons](#) licence will apply to this Work are set out in our licence referred to above.

Other than as permitted in any relevant BMJ Author's Self Archiving Policies, I confirm this Work has not been accepted for publication elsewhere, is not being considered for publication elsewhere and does not duplicate material already published. I confirm all authors consent to publication of this Work and authorise the granting of this licence.

1  
2  
3  
4  
5  
6  
7  
8 **Title**  
9

10 Identifying the predictors of avoidable emergency department attendance after contact  
11 with the NHS 111 phone service: Analysis of 16.6 million calls to 111 in England in  
12 2015-17  
13  
14

15  
16 **Authors**

17 Mark Egan\*, Filip Murar, James Lawrence, Hannah Burd  
18  
19

20 \* Correspondence: mark.egan@bi.team  
21  
22  
23  
24  
25  
26  
27  
28  
29  
30  
31  
32  
33  
34  
35  
36  
37  
38  
39  
40  
41  
42  
43  
44  
45  
46  
47  
48  
49  
50  
51  
52  
53  
54  
55  
56  
57  
58  
59  
60

## Abstract

**Objectives:** To measure the frequency of patients making avoidable emergency department (ED) attendances after contact with NHS 111, and to examine whether these attendances can be predicted reliably.

**Design:** Analysis of 16,563,946 calls made to 111, where each call was linked with a record of whether the patient attended ED within 24 hours.

**Setting:** All regions of England from March 2015 to October 2017.

**Participants and data:** Our main regression model used a sample of 10,954,783 calls, each with detailed patient-level information.

**Main outcome:** Whether patients made an unadvised, nonurgent Type 1 ED (“avoidable”) attendance within 24 hours of calling 111.

**Results:** Of 16,563,946 calls where 111 did not advise patients to go to the ED, 12,894,561 (77.8%) were advised to either attend primary care, attend another (non-ED) healthcare service, or to self-care. Of these latter calls, 691,783 (5.4%) resulted in the patient making an avoidable ED attendance within 24 hours, incurring £65 million in tariff charges (£2.1 million per month).

Among other factors, calls were less likely to result in these attendances when they received clinical input (adjusted odds ratio [OR] 0.52, 95% CI 0.51-0.53), but were more likely when the patient was female (OR 1.07, 95% CI 1.06-1.08) or aged 0-4 (OR 1.34, 95% CI 1.33-1.35).

**Conclusions:** For every 20 calls where 111 did not advise people to attend the ED, 1 resulted in avoidable ED attendance within 24 hours. These avoidable attendances could be predicted, to a certain extent, based on call characteristics. It may be possible to use this information to help 111 call-handlers identify which callers are at high risk of these attendances.

## Strengths and limitations of this study

- The analysis relies on a large national-level dataset containing 47% of all 111 calls in England in the study period
- It adjusts for a large set of covariates known to be predictive of avoidable ED attendances.
- However, other potentially important predictors of health behaviour, such as health history or other interactions with healthcare providers, were not available in the data.
- We conducted both a conventional (OLS and logistic) regression and a predictive (gradient-boosting) analysis.

## Introduction

9.7 million (50%) of the 19.4 million attendances made at hospital emergency departments (EDs) in England in 2016-17 resulted in the patient receiving either no treatment, or advice and guidance only.<sup>1</sup> This incurred an estimated total cost to the NHS of over £500 million, at a time when “*pressures on the NHS are greater than they have ever been.*”<sup>2,3</sup> The low-intensity care received by these patients suggests at least some could have been treated safely elsewhere (e.g. GP practice, pharmacy, or at home), at lower cost to the healthcare system.

One way to potentially reduce the number of nonurgent ED attendances is by encouraging greater use of the 111 service. NHS 111 is a free, non-emergency healthcare telephone line in Britain which aims to ensure that callers are seen at the “*right place, first time.*”<sup>4</sup> Call-handlers for the 111 service assess callers’ health problems using a clinically-validated triage algorithm (‘NHS Pathways’),<sup>5</sup> then either dispatch an ambulance or recommend the caller attend ED, or advise the caller to go to primary care, attend another healthcare service, or to self-care.

Given that 111 received 16 million calls in England in 2017-18,<sup>6</sup> the service is well-placed to direct large numbers of patients with nonurgent health problems to seek treatment outside the ED. However, it is not clear how often calls produce this result in practice. An evaluation of 111 in its first year of operation found it had no statistically significant impact on ED attendance rates.<sup>7</sup> More recent work has found that the Pathways algorithm may recommend ED attendance more often than necessary,<sup>8</sup> and that some 111 staff believe the service has increased the number of nonurgent calls compared to previous out-of-hours primary care services.<sup>9</sup>

Although there have been several big-data studies examining the predictors of nonurgent ED attendance rates in England,<sup>10,11,12</sup> it has only recently become possible to do large-scale analysis of linked 111/ED data (i.e. data which links individual 111 calls with a record of whether that caller went on to attend ED).<sup>13</sup> This linked data makes it possible to examine how often patients end up making nonurgent ED attendances after calling 111. To date, one other study has been published using this

1  
2  
3 linked data: it examined a dataset of 10,356 callers across three areas of North West  
4 London and found that 15% of callers advised by 111 to manage their health needs at  
5 home attended an ED within 10 hours (this rate was lower when patients were given  
6 GP out-of-hours appointments or when the 111 call received input from a clinical  
7 supervisor).<sup>14</sup>  
8  
9

10  
11 This study uses a national-level linked 111-ED dataset to examine how often 111  
12 callers end up making unadvised, nonurgent Type 1 (henceforth 'avoidable') ED  
13 attendances within 24 hours of their call, and to examine the predictors of these  
14 attendances. We do this using a dataset of 16,563,946 calls made to 111 from March  
15 2015 to October 2017, where each call contained patient-level information and a  
16 record of whether the patient attended ED within 24 hours.  
17  
18  
19

## 20 21 **Methods**

22  
23 **Study design.** The data initially contained 18,127,605 observations, where each row  
24 was a call made to 111 between 31 March 2015 and 31 October 2017. This represents  
25 almost half (47%) of the 38,585,200 million calls made to 111 between March 2015  
26 and October 2017.<sup>6</sup> Each call was linked with a Secondary Use Services (SUS) record  
27 of whether the patient attended ED within 24 hours of the 111 call. We used logistic  
28 and OLS regressions and a gradient boosted decision tree model to assess the extent  
29 to which we could predict whether the call would result in an avoidable ED attendance  
30 within 24 hours.  
31  
32

33  
34 **Data cleaning.** We excluded rows missing the date / time of the 111 call (n = 52,394),  
35 final disposition code (n = 878,461), which had disposition codes<sup>15</sup> indicating the call  
36 was not relevant to our research question (n = 167,182), missing patient's gender (n  
37 = 246,144), missing patient age or where age was over 110 years (n = 46,656), and  
38 calls whose duration was above the 99th percentile (more than 190 minutes) as these  
39 were presumed to be data errors (n = 172,822). Note that the following disposition  
40 codes were considered irrelevant to the research question: Dx78 ("Receive Report of  
41 Results or Tests from Laboratory"), Dx83 ("Clinician Home Management of Dying  
42 Individual (Expected)"), Dx91 ("Unexpected Death"), Dx95 ("The Call is Closed with  
43 No Further Action Required, Wrong Service Called"), Dx116 ("Speak to the Primary  
44 Care Service within 6 hours for Expected Death"), and Dx117 ("Speak to a Primary  
45 Care Service within 1 hour for Palliative Care").  
46  
47  
48  
49

50  
51 This reduced the sample to 16,563,946 triaged calls, from which we produced  
52 descriptive statistics. Our main regression model used a smaller sample of 10,954,783  
53 calls, as this retained only rows with complete information on the outcome measure  
54 and all control variables.  
55  
56  
57

58  
59 **Outcome measure.** Our outcome measure was a binary indicator of whether a patient  
60 made an avoidable ED attendance within 24 hours of calling 111. Figure 1 shows how

we coded the outcome measure. We defined an ED attendance as “avoidable” if, after being told by 111 to do something other than go to the ED, the patient attended ED within 24 hours and was assigned Healthcare Resource Group (HRG) treatment codes VB07Z (“category 2 investigation with category 2 treatment”), VB08Z (“category 2 investigation with category 1 treatment”), VB09Z (“category 1 investigation with category 1-2 treatment”), or VB11Z (“no investigation with no significant treatment”),<sup>16</sup> and was not admitted, not referred to another healthcare specialist by the ED, and did not die in the ED department.

### Figure 1. How the outcome measure was coded.

[figure 1]

**Control measures.** Our analysis used 18 control variables, shown in past research to be important predictors of ED attendance in England, which fell into five broad categories:

- *2 patient characteristics:* (i) a continuous measure of patient age and (ii) a binary measure of patient gender.
- *5 geographic characteristics:* (iii) a binary indicator of whether the patient was from a rural vs urban area,<sup>17</sup> (iv) a categorical variable identifying what region of England the patient was from (North, Midlands, South & East, or London), (v) the distance ratio between the patient’s local area and the nearest ED relative to a GP, (vi) the deprivation of the patient’s local area (measured in quintiles using 2015 indices of multiple deprivation scores), and (vii) a categorical indicator of which of the 40 different 111 sites present in the data handled the call, to account for any unobserved variation in the way different 111 sites interact with patients.<sup>18</sup>
- *2 GP practice characteristics:* (viii) a variable from the GP Patient Survey which recorded the proportion of patients saying “Yes” or “Yes, but I had to call back closer to or on the day I wanted the appointment” in response to “Were you able to get an appointment to see or speak to someone?”, and (ix) an indicator of the number of full-time-equivalent (FTE) GPs at each practice.<sup>19</sup>
- *3 call characteristics:* (x) duration of the 111 call in minutes, (xi) a binary variable indicating whether the call had clinical input (21% of calls did), and (xii) the NHS Pathways disposition code assigned to the patient at the end of the call.
- *6 temporal characteristics:* Using the date and time the call was made to 111, we constructed variables for (xiii) hour of the day, (xiv) day of week, (xv) month, (xvi) year (2015, 2016, or 2017), and binary indicators for whether the day was a (xvii) bank holiday, or (xviii) spanned the December 24-26 period.

The distance ratio, i.e. variable (v) was calculated as the average travel time by public transport and/or walking to the nearest hospital relative to the nearest GP and included under the assumption that a patient’s decision to see a GP or go to the ED is likely to be influenced by the relative ease of accessing these two locations).<sup>20,21</sup>



1  
2  
3 Deprivation, i.e. variable (vi), was measured using 2015 indices of multiple deprivation  
4 (IMD) scores, which were matched to patients' local areas using their LSOA code.  
5 While deprivation is typically measured using the aggregate IMD score compiled from  
6 7 different subdomain measures (e.g. deprivation for income, deprivation for health,  
7 deprivation for employment, etc), it is not entirely appropriate to use this aggregate  
8 measure when predicting ED attendance. This is because the health score, which  
9 comprises 13.5% of the total IMD score, itself incorporates local ED attendance rates  
10 as a measure of local health deprivation.<sup>22</sup> This sort of mathematical coupling (i.e.  
11 using a score which includes ED attendances to predict ED attendances) can lead to  
12 spurious correlations in statistical assessment. We therefore followed an established  
13 procedure to construct an alternative aggregate IMD score which excluded the health  
14 domain but retained the other six deprivation domains.<sup>23</sup>

15  
16  
17  
18  
19  
20 Ease of securing a GP appointment, i.e. variable (viii) relied on the GP Patient Survey  
21 (GPPS), which is a questionnaire sent to users of GP practices. It asks people to rate  
22 the performance of their GP practice on dimensions such as quality of care,  
23 satisfaction with opening hours, and a subjective assessment of how easy it is to get  
24 an appointment. We retained only data for GP practices who had received at least 50  
25 responses to these questionnaires. In order to maximise sample size, we took the  
26 average score for the GP characteristic variables across the three GPPS waves  
27 published in January 2016, July 2016, and July 2017.<sup>24</sup>

28  
29  
30  
31  
32 The disposition code variable (xii) indexed 96 different disposition codes present in the  
33 data which contained at least 30 observations. These codes used the standard "Dx"  
34 coding format (e.g. "Dx14 = Speak to a Primary Care Service within 12 hours") used  
35 by the 111 services.<sup>15</sup> These disposition codes were the ones recorded by the call  
36 handler or clinical advisor who initially managed the 111 call, but in some cases,  
37 patients will have gone on to have further interactions with the 111 service after this  
38 disposition was assigned. For example, they may have received a call-back from  
39 another healthcare professional, who may have assigned them a different disposition.

40  
41  
42  
43  
44 Detailed descriptive statistics for each of the control variables can be found in table S1  
45 in the Supplement.

## 46 47 48 **Results**

### 49 50 51 **Descriptive statistics**

52  
53 Figure 2 shows the ED outcomes of 16,563,946 calls in the data, broken down by NHS  
54 Pathways disposition assigned at the end of the call, and with the original number of  
55 calls normalised to 1000 for ease of interpretation. For every 1000 callers, 779 were  
56 not advised by 111 to attend ED (i.e. they were told to attend primary care, attend  
57 another service, or self-care). Of these, 83 went on to make a Type 1 ED attendance  
58 anyway within 24 hours. Of these, 42 were classified as avoidable.

**Figure 2. Outcomes of 16,563,946 calls made to 111 from March 2015 to October 2017. For ease of interpretation the total number of calls has been normalised to 1,000.**

[figure 2.png]

Avoidable = Patient got Healthcare Resource Group (HRG) treatment code VB07Z ("category 2 investigation with category 2 treatment"), VB08Z ("category 2 investigation with category 1 treatment"), VB09Z ("category 1 investigation with category 1-2 treatment"), or VB11Z ("no investigation with no significant treatment"), and was not admitted, not referred to another healthcare specialist by the ED, and did not die in the ED department.

Stated differently, for calls where patients were not advised to attend ED, 5.4% resulted in avoidable ED attendances within 24 hours. Using the NHS national tariff charges present in the data for each ED attendance, we calculated that these avoidable attendances incurred tariff costs of £65 million (£2.1 million per month) over the March 2015 to October 2017 period covered in our data. If we extrapolate this 5.4% incidence rate of avoidable attendances to all 38,585,200 calls made to 111 between March 2015 and October 2017 (i.e. including calls not in our data), this implies £58.8m in tariff charges were incurred per year by avoidable ED attendances.

### Regression analyses

Table 1 shows the results of our logistic and OLS regression analyses. Column 1 shows exponentiated logistic regression coefficients, which can be interpreted as odds ratios. Column 2 shows the coefficients of an ordinary least squares regression (i.e. a linear probability model) with the same specification – which, although problematic as it violates the assumption of non-negative probabilities, provides a more easily interpretable way of assessing the strength of the observed associations.

Notable results include that calls were 3.65 percentage points (95% CI -3.76, -3.54) less likely to result in avoidable attendances (relative to a baseline of 5.6%) when the call had clinical input, and 0.8 points less likely (95% CI -1.0, -0.6) when the caller was registered with a GP practice where it was easier than other practices to get an appointment. Calls were 0.34 points more likely to result in these attendances when the patient was female (95% CI 0.31-0.37), 1.72 points more likely when the patient was aged 0-4 (95% CI 1.68-1.75), and 0.17 points more likely when the patient lived in a more deprived area (95% CI 0.16-0.18).

**Table 1. Summary results of the association between 111 call characteristics and the probability of making an avoidable Type 1 ED attendance within 24 hours.**

|          | Column 1             | Column 2        |
|----------|----------------------|-----------------|
| Variable | Logistic regression, | OLS regression, |

|                                                                                                                              | <b>odds ratios<br/>(95% CI)</b> | <b>percentage point<br/>changes<br/>(95% CI)</b> |
|------------------------------------------------------------------------------------------------------------------------------|---------------------------------|--------------------------------------------------|
| <i>Patient characteristics</i>                                                                                               |                                 |                                                  |
| Patient aged 0-4 (vs all other ages)                                                                                         | 1.34***<br>(1.33, 1.35)         | 1.72***<br>(1.68, 1.75)                          |
| Female (vs male) patient                                                                                                     | 1.07***<br>(1.06, 1.08)         | 0.34***<br>(0.31, 0.37)                          |
| <i>Geographic characteristics</i>                                                                                            |                                 |                                                  |
| Quintile of area deprivation<br>(1 = least deprived, 5 = most deprived)                                                      | 1.03***<br>(1.03, 1.03)         | 0.17***<br>(0.16, 0.18)                          |
| Patient's distance to hospital<br>relative to GP                                                                             | 1.00<br>(1.00, 1.00)            | 0.00<br>(-0.01, 0.01)                            |
| Patient in rural (vs urban) area                                                                                             | 0.91***<br>(0.90, 0.92)         | -0.44***<br>(-0.48, -0.40)                       |
| <i>GP practice characteristics</i>                                                                                           |                                 |                                                  |
| Effect of 10 percentage point<br>increase in % of patients saying<br>they can typically get an<br>appointment at GP practice | 0.87***<br>(0.83, 0.90)         | -0.79***<br>(-0.97, -0.61)                       |
| Effect of 10 additional FTEs at<br>GP practice                                                                               | 0.99***<br>(0.99, 0.99)         | -.03***<br>(-.04, -.03)                          |
| <i>Call characteristics</i>                                                                                                  |                                 |                                                  |
| Call received clinical input (vs<br>no input)                                                                                | 0.52***<br>(0.51, 0.53)         | -3.65***<br>(-3.76, -3.54)                       |
| Call duration in minutes                                                                                                     | 0.99***<br>(0.99, 0.99)         | -0.02***<br>(-0.02, -0.02)                       |
| Bank holiday                                                                                                                 | 0.83***<br>(0.81, 0.84)         | -0.09***<br>(-0.10, -0.08)                       |
| Christmas period (Dec 24-26)                                                                                                 | 1.03*<br>(1.00, 1.06)           | 0.13<br>(-0.02, 0.27)                            |
| Additional controls?                                                                                                         | Yes                             | Yes                                              |
| Baseline                                                                                                                     | 0.059/1                         | 5.6%                                             |
| Goodness of fit                                                                                                              | AUC = 0.70                      | R <sup>2</sup> = 3.4%                            |

|              |            |            |
|--------------|------------|------------|
| Observations | 10,954,783 | 10,954,783 |
|--------------|------------|------------|

Additional controls = hour of day, day of week, month of year, year, region of England, 111 site, and disposition code assigned to the call.  
\*  $p < .05$ , \*\*  $p < .01$ , \*\*\*  $p < .001$ .

### Gradient-boosting model

We next tested whether we could improve our ability to predict which 111 calls would result in avoidable ED attendances by running a gradient boosted tree model (GBM).<sup>25</sup> We built the GBM using a training subset of the data (a random selection of 80% of the 10,954,783 rows) and evaluated its out-of-sample predictions using a test subset (the remaining 20% of rows).

As a test of the GBM's incremental accuracy, we applied the same train-test procedure with the logistic regression model described in Table 1, and compared the predictive ability of the two models using an area-under-curve (AUC) score. We found the AUC was 0.70 for the logistic regression and 0.73 for the GBM (note that a model which randomly guesses the outcome would have an AUC of 0.5 and a model which makes perfect predictions would have an AUC of 1.0). This implies that the ability of the GBM to automatically find nonlinear relationships and interactions did result in (slightly) more accurate predictions about which 111 callers would end up making avoidable ED attendances. However, even the GBM did not reach very high levels of predictive accuracy (as would be indicated by an AUC score of 0.80 or higher).

Table 2 shows the next result from the GBM — a quantification of the relative importance of the different types of variables in our analysis, in terms of the proportion of the overall predictive power (measured in terms of deviance, a generalised notion of residual sum of squares) they explained. Of the variation which we could explain, 91% was accounted for by a combination of the call characteristics, geographic characteristics, and temporal characteristics, and the remaining 9% was explained by patient-level and GP-practice characteristics.

**Table 2. Decomposition of the relative importance of different characteristics in predicting avoidable ED attendances after a 111 call.**

|                                               | Proportion of explainable deviance in the outcome measure captured by variable type |
|-----------------------------------------------|-------------------------------------------------------------------------------------|
| Call characteristics                          | 51.5%                                                                               |
| NHS Pathways disposition assigned to 111 call | 42.7%                                                                               |
| Call duration                                 | 7.7%                                                                                |

|                                         |              |
|-----------------------------------------|--------------|
| Clinical input                          | 1.1%         |
| <b>Geographic characteristics</b>       | <b>25.6%</b> |
| 111 site                                | 17.1%        |
| Region of England                       | 4.4%         |
| Distance from caller's home to hospital | 2.7%         |
| Index of multiple deprivation           | 1.1%         |
| Caller from rural (vs urban) area       | 0.5%         |
| <b>Temporal characteristics</b>         | <b>13.9%</b> |
| Hour of day                             | 7.4%         |
| Month of year                           | 3.4%         |
| Day of week                             | 2.0%         |
| Year                                    | 0.8%         |
| Bank holiday                            | 0.2%         |
| Christmas                               | 0.1%         |
| <b>Patient characteristics</b>          | <b>4.6%</b>  |
| Patient aged 0-4 (vs all other ages)    | 2.6%         |
| Female (vs male) patient                | 2.0%         |
| <b>GP practice characteristics</b>      | <b>4.4%</b>  |
| Number of FTE employees                 | 2.5%         |
| Ease of getting appointment             | 1.9%         |

Finally, we used the GBM's predictions to classify the calls into different risk categories. For every 1000 triaged calls, we classified:

- 558 as low-risk (<5% predicted probability of avoidable ED attendance), of which 15 (2.6%) resulted in an avoidable ED attendance,
- 328 as medium-risk (5%–10% predicted probability of avoidable ED attendance), of which 23 (7.0%) resulted in an avoidable ED attendance, and
- 114 as high-risk (>10% predicted probability of avoidable ED attendance), of which 19 (16.2%) resulted in an avoidable ED attendance.

Using this (somewhat arbitrary) classification, high-risk calls were 6.2 times more likely than low-risk calls to result in avoidable ED attendances (although a large majority of even the high-risk calls did not result in these attendances).

## Discussion

Our analysis of the largest yet published dataset of linked 111 calls and subsequent ED attendances found that, of patients not advised by 111 to go to ED, around 1 in 20 (5.4%) made an avoidable Type 1 ED attendance within 24 hours of the call. Although our analysis could not answer the counterfactual of "would overall avoidable ED attendances be higher or lower if the 111 service did not exist?", this finding does at least suggest that 111 is not causing a large fraction of callers to inappropriately seek treatment at the ED.

The key strengths of this study were: our use of a national-level dataset containing over 16 million calls to 111 (47% of the total number of 111 calls made over the study period); our use of an extensive set of covariates known to be predictive of avoidable ED attendances, and; our combination of both conventional (OLS, logistic regression) and cutting-edge (GBM) analytic techniques. One of our key findings – that calls which received clinical input were much less likely to result in avoidable ED attendance – replicated the same association found in the only other paper to date examining linked 111-ED data.<sup>26</sup> Key limitations included lack of controls for other characteristics likely predictive of health behaviour (e.g. patients' education, risk aversion, and health history), and the fact that the data did not record interactions patients may have had with 111 soon after their initial call (e.g. a 111 call-handler could have arranged for the patient to receive a call-back from a clinical advisor or out-of-hours GP within a few hours of their initial call, but this subsequent call would not be recorded in the data we examined).

After adjusting for the full set of covariates, which included information about the time, duration and location of the call, the age and gender of the caller, and the caller's GP practice, we classified calls into low-, medium-, and high-risk for avoidable ED attendance, and found that high-risk calls were 6 times more likely than low-risk ones to result in avoidable attendances. This suggests that it may be possible to use existing data resources to construct a tool which helps 111 call-handlers identify callers at high risk of these attendances — similar to how traffic light systems are used to identify gradations of risk in other health assessments.<sup>27</sup> Call handlers could then provide extra resource for these calls (e.g. spend more time providing self-care instructions or assistance securing a GP appointment).

Future research could seek to replicate and expand our analysis as more and more linked data becomes available. Given that our analysis included only 47% of 111 calls made in the examined time period, it is possible that selection effects may be distorting our own findings (e.g. perhaps 111 sites with lower avoidable attendance rates were more likely to provide their data to NHS Digital). Future work could also aim to test whether avoidable attendance rates could be reduced by providing a traffic light warning system for 111 call handlers, or by providing regular feedback to individual

1  
2  
3  
4  
5  
6  
7  
8  
9  
10  
11  
12  
13  
14  
15  
16  
17  
18  
19  
20  
21  
22  
23  
24  
25  
26  
27  
28  
29  
30  
31  
32  
33  
34  
35  
36  
37  
38  
39  
40  
41  
42  
43  
44  
45  
46  
47  
48  
49  
50  
51  
52  
53  
54  
55  
56  
57  
58  
59  
60

call-handlers or 111 sites about the avoidable attendance rate associated with their calls.

For peer review only

**Acknowledgements.** The authors thank the members of the NHS England Research & Evaluation team, particularly Holly Krelle and Dilwyn Sheers for providing access to the data and feedback on the analytic strategy. We would also like to thank the study's sponsors: Ed Rose and colleagues in NHS England's Integrated Urgent Care team. Michael Hallsworth of the Behavioural Insights Team supported the conception of the study.

**Author contributions.** HB conceived the study and designed it with help from ME. ME and FM wrote the first draft of the paper. All authors assisted in the interpretation of data and creation of the final draft. ME is the guarantor.

**Funding.** The study was funded by NHS England.

**Competing interests.** None.

**Ethics approval.** The study was approved by both the Health Research Authority's London - Fulham Research Ethics Committee (REC reference 17/LO/1569) and Confidentiality Advisory Group (CAG reference 17/CAG/0159).

**Data sharing statement.** The linked 111-ED data was provided by NHS England to the authors for the purposes of this study. Under this agreement the authors do not have permission to share the dataset.

**Disclaimer.** This is an independent report commissioned and funded by NHS England. The views expressed are not necessarily those of NHS England.

**Word count:** 3902

## References:

<sup>1</sup> Hospital Accident and Emergency Activity - 2016-17, Table 19 [Internet]. NHS Digital [cited 2019 Apr 12]. Available from: <https://files.digital.nhs.uk/publication/e/7/acci-emer-atte-eng-2016-17-data.xlsx>

<sup>2</sup> National tariff payment system 2017/18 and 2018/19, Annex B, file "2017-18 A and E model", sheet "2016-17 A&E Tariff" [Internet]. NHS Improvement [cited 2019 Apr 12]. Available from: <https://improvement.nhs.uk/resources/national-tariff-1719/>

<sup>3</sup> The NHS in 2017 [Internet]. NHS England [cited 2019 Apr 12]. Available from: <https://www.england.nhs.uk/five-year-forward-view/next-steps-on-the-nhs-five-year-forward-view/the-nhs-in-2017/>

<sup>4</sup> NHS 111 Commissioning Standards [Internet]. NHS England. 2014 Jun [cited 2019 Apr 12]. Available from: <https://www.england.nhs.uk/wp-content/uploads/2014/06/nhs111-coms-stand.pdf>

<sup>5</sup> NHS Pathways [Internet]. NHS Digital [cited 2019 Apr 12]. Available from: <https://digital.nhs.uk/services/nhs-pathways>

<sup>6</sup> Kay I. NHS 111 Minimum Data Set (MDS) [Internet]. NHS England. 2017 [cited 2019 Apr 12]. Available from: <https://www.england.nhs.uk/statistics/wp-content/uploads/sites/2/2018/07/20180712-NHS-111-MDS-time-series-to-June-2018.xlsx>

<sup>7</sup> Turner J, O'Cathain A, Knowles E, Nicholl J. Impact of the urgent care telephone service NHS 111 pilot sites: a controlled before and after study. *BMJ Open*, 2013;3(11):e003451.

<sup>8</sup> Anderson A, Roland M. Potential for advice from doctors to reduce the number of patients referred to emergency departments by NHS 111 call handlers: observational study. *BMJ Open*. 2015;5(11):e009444.



- 1  
2  
3
- 
- 4 <sup>9</sup> Pope C, Turnbull J, Jones J, Prichard J, Rowsell A, Halford S. Has the NHS 111 urgent care  
5 telephone service been a success? Case study and secondary data analysis in England. *BMJ Open*.  
6 2017;7(5):e014815.  
7
- 8 <sup>10</sup> McHale P, Wood S, Hughes K, Bellis M, Demnitz U, Wyke S. Who uses emergency departments  
9 inappropriately and when - a national cross-sectional study using a monitoring data system. *BMC*  
10 *Medicine*. 2013;11(1):258.  
11
- 12 <sup>11</sup> Cowling T, Cecil E, Soljak M, Lee J, Millett C, Majeed A, *et al*. Access to primary care and visits to  
13 emergency departments in England: a cross-sectional, population-based study. *PloS One*.  
14 2013;8(6):e66699.  
15
- 16 <sup>12</sup> Tammes P, Morris R, Brangan E, Checkland K, England H, Huntley A, *et al*. Exploring the  
17 relationship between general practice characteristics and attendance at walk-in centres, minor injuries  
18 units and EDs in England 2012/2013: a cross-sectional study. *Emerg Med J*. 2016;33(10):702-8.  
19
- 20 <sup>13</sup> NHS 111 Pathways NHS number Data Provision Service [Internet]. NHS Digital [cited 2019 Apr 12].  
21 Available from: [https://digital.nhs.uk/about-nhs-digital/corporate-information-and-](https://digital.nhs.uk/about-nhs-digital/corporate-information-and-documents/directions-and-data-provision-notice/data-provision-notice-dpns/nhs-111-pathways-nhs-number-data-provision-notice)  
22 [documents/directions-and-data-provision-notice/data-provision-notice-dpns/nhs-111-pathways-nhs-](https://digital.nhs.uk/about-nhs-digital/corporate-information-and-documents/directions-and-data-provision-notice/data-provision-notice-dpns/nhs-111-pathways-nhs-number-data-provision-notice)  
23 [number-data-provision-notice](https://digital.nhs.uk/about-nhs-digital/corporate-information-and-documents/directions-and-data-provision-notice/data-provision-notice-dpns/nhs-111-pathways-nhs-number-data-provision-notice)  
24
- 25 <sup>14</sup> Wolters A, Robinson C, Hargreaves D, Pope R, Maconochie I, Deeny S, Steventon A. Predictors of  
26 emergency department attendance following NHS 111 calls for children and young people: analysis of  
27 linked data. *bioRxiv*. 2018 Jan 1:237750.  
28
- 29 <sup>15</sup> Dx Code Mapping to Disposition [Internet]. NHS England. 2015 [cited 2019 Apr 12]. Available from:  
30 [https://www.england.nhs.uk/statistics/wp-content/uploads/sites/2/2015/05/Dx-code-V13.0-mapping-to-](https://www.england.nhs.uk/statistics/wp-content/uploads/sites/2/2015/05/Dx-code-V13.0-mapping-to-111-publication-data-items.xlsx)  
31 [111-publication-data-items.xlsx](https://www.england.nhs.uk/statistics/wp-content/uploads/sites/2/2015/05/Dx-code-V13.0-mapping-to-111-publication-data-items.xlsx)  
32
- 33 <sup>16</sup> Chapter Summaries, HRG4+ 2017/18 Local Payment Grouper [Internet]. NHS Digital. 2017 [cited  
34 2019 Apr 12]. Available from:  
35 [https://digital.nhs.uk/binaries/content/assets/legacy/pdf/n/i/hrg4\\_\\_201718\\_local\\_payment\\_grouper\\_ch](https://digital.nhs.uk/binaries/content/assets/legacy/pdf/n/i/hrg4__201718_local_payment_grouper_chapter_summaries_v1.0.pdf)  
36 [apter\\_summaries\\_v1.0.pdf](https://digital.nhs.uk/binaries/content/assets/legacy/pdf/n/i/hrg4__201718_local_payment_grouper_chapter_summaries_v1.0.pdf)  
37
- 38 <sup>17</sup> Rural Urban Classification (2011) of Lower Layer Super Output Areas in England and Wales  
39 [Internet]. Office for National Statistics. 2013 [cited 2019 Apr 12]. Available from:  
40 [https://data.gov.uk/dataset/b1165cea-2655-4cf7-bf22-dfbd3cdeb242/rural-urban-classification-2011-](https://data.gov.uk/dataset/b1165cea-2655-4cf7-bf22-dfbd3cdeb242/rural-urban-classification-2011-of-lower-layer-super-output-areas-in-england-and-wales)  
41 [of-lower-layer-super-output-areas-in-england-and-wales](https://data.gov.uk/dataset/b1165cea-2655-4cf7-bf22-dfbd3cdeb242/rural-urban-classification-2011-of-lower-layer-super-output-areas-in-england-and-wales)  
42
- 43 <sup>18</sup> Kay I. NHS 111 Minimum Data Set (MDS), tab 'CCG to 111 Area & Provider' [Internet]. 2017 Aug  
44 [cited 2019 Apr 12]. Available from: [https://www.england.nhs.uk/statistics/wp-](https://www.england.nhs.uk/statistics/wp-content/uploads/sites/2/2017/06/MDS-Web-File-National-up-to-June-2017.xlsx)  
45 [content/uploads/sites/2/2017/06/MDS-Web-File-National-up-to-June-2017.xlsx](https://www.england.nhs.uk/statistics/wp-content/uploads/sites/2/2017/06/MDS-Web-File-National-up-to-June-2017.xlsx), tab  
46
- 47 <sup>19</sup> Kay I. NHS 111 Minimum Data Set (MDS) [Internet]. 2017 Aug [cited 2019 Apr 12]. Available from:  
48 <https://digital.nhs.uk/catalogue/PUB30044>  
49
- 50 <sup>20</sup> Moyce R, Corvaglia F. Travel time, destination and origin indicators for GPs by mode of travel,  
51 Lower Super Output Area (LSOA), England. Department for Transport 2018. [cited 2019 Apr 12].  
52 Available from:  
53 [https://assets.publishing.service.gov.uk/government/uploads/system/uploads/attachment\\_data/file/748](https://assets.publishing.service.gov.uk/government/uploads/system/uploads/attachment_data/file/748220/jts0506.ods)  
54 [220/jts0506.ods](https://assets.publishing.service.gov.uk/government/uploads/system/uploads/attachment_data/file/748220/jts0506.ods)  
55
- 56 <sup>21</sup> Moyce R, Corvaglia F. Travel time, destination and origin indicators for Hospitals by mode of travel,  
57 Lower Super Output Area (LSOA), England [Internet]. Department for Transport. 2018 [cited 2019 Apr  
58 12]. Available from:  
59 [https://assets.publishing.service.gov.uk/government/uploads/system/uploads/attachment\\_data/file/748](https://assets.publishing.service.gov.uk/government/uploads/system/uploads/attachment_data/file/748220/jts0506.ods)  
60 [220/jts0506.ods](https://assets.publishing.service.gov.uk/government/uploads/system/uploads/attachment_data/file/748220/jts0506.ods)

- 1  
2  
3
- 
- 4 22 Smith T, Noble M, Noble S, Wright G, McLennan D, Plunkett E. The English Indices of Deprivation  
5 2015 [Internet]. Department for Communities and Local Government. 2015 [cited 2019 Apr 12].  
6 Available from:  
7 [https://www.gov.uk/government/uploads/system/uploads/attachment\\_data/file/464485/English\\_Indices](https://www.gov.uk/government/uploads/system/uploads/attachment_data/file/464485/English_Indices_of_Deprivation_2015_-_Technical-Report.pdf)  
8 [\\_of\\_Deprivation\\_2015\\_-\\_Technical-Report.pdf](https://www.gov.uk/government/uploads/system/uploads/attachment_data/file/464485/English_Indices_of_Deprivation_2015_-_Technical-Report.pdf)  
9
- 10 23 Adams J, White M. Removing the health domain from the Index of Multiple Deprivation 2004—  
11 effect on measured inequalities in census measure of health. *J Public Health*. 2006;28(4):379-83.  
12
- 13 24 GP Patient Survey [Internet]. NHS England [cited 2019 Apr 12]. Available from: [https://gp-](https://gp-patient.co.uk/SurveysAndReports)  
14 [patient.co.uk/SurveysAndReports](https://gp-patient.co.uk/SurveysAndReports)  
15
- 16 25 Friedman J. Greedy Function Approximation: A Gradient Boosting Machine. *Ann. Stat.* 2001;29(5):  
17 1189-1232.  
18
- 19 26 Wolters A, Robinson C, Hargreaves D, Pope R, Maconochie I, Deen, S, Steventon. Predictors of  
20 emergency department attendance following NHS 111 calls for children and young people: analysis of  
21 linked data. *BioRxiv*. 2018.  
22
- 23 27 Feverish illness in children, NICE clinical guideline 160 [Internet]. National Institute for Health and  
24 Care Excellence. 2013 May [cited 2019 Apr 12]. Available from:  
25 [https://www.nice.org.uk/guidance/cg160/resources/support-for-education-and-learning-educational-](https://www.nice.org.uk/guidance/cg160/resources/support-for-education-and-learning-educational-resource-traffic-light-table-189985789)  
26 [resource-traffic-light-table-189985789](https://www.nice.org.uk/guidance/cg160/resources/support-for-education-and-learning-educational-resource-traffic-light-table-189985789)  
27  
28  
29  
30  
31  
32  
33  
34  
35  
36  
37  
38  
39  
40  
41  
42  
43  
44  
45  
46  
47  
48  
49  
50  
51  
52  
53  
54  
55  
56  
57  
58  
59  
60

1  
2  
3  
4  
5  
6  
7  
8  
9  
10  
11  
12  
13  
14  
15  
16  
17  
18  
19  
20  
21  
22  
23  
24  
25  
26  
27  
28  
29  
30  
31  
32  
33  
34  
35  
36  
37  
38  
39  
40  
41  
42  
43  
44  
45  
46  
47  
48  
49  
50  
51  
52  
53  
54  
55  
56  
57  
58  
59  
60

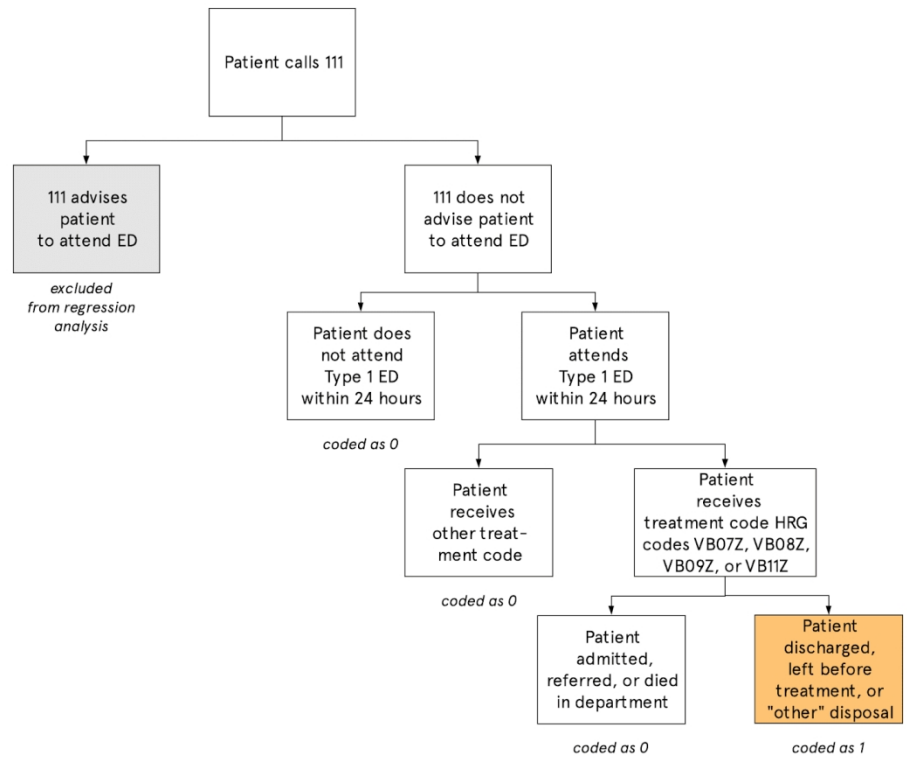

Figure 1. How the outcome measure was coded.

564x480mm (72 x 72 DPI)

**Number of triaged 111 calls resulting in Type 1 ED attendance within 24 hours**

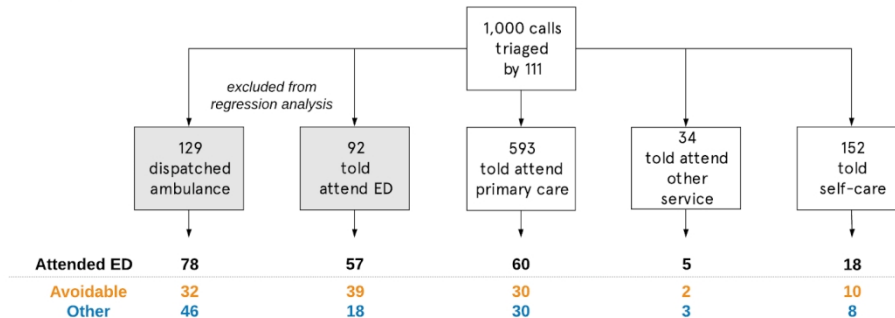

Figure 2. Outcomes of 16,563,946 calls made to 111 from March 2015 to October 2017. For ease of interpretation the total number of calls has been normalised to 1,000.

564x265mm (72 x 72 DPI)

Table S1. Descriptive statistics for selected control variables.

| Variable (min-max)                                                           | Observations | Mean (SD) / % |
|------------------------------------------------------------------------------|--------------|---------------|
| <b>Patient characteristics</b>                                               |              |               |
| Age (0-110)                                                                  | 16,563,946   | 37.7 (27.9)   |
| Gender                                                                       | 16,563,946   | 100%          |
| <i>Male</i>                                                                  | 7,003,057    | 42.3%         |
| <i>Female</i>                                                                | 9,560,889    | 57.7%         |
| IMD quintile (1-5)                                                           | 15,690,550   | 3.2 (1.4)     |
| Ratio distance of nearest hospital<br>to nearest GP (0.4 - 44.6)             | 16,256,118   | 4.1 (2.4)     |
| Type of area                                                                 | 15,707,810   | 100%          |
| <i>Urban</i>                                                                 | 13,535,244   | 86.2%         |
| <i>Rural</i>                                                                 | 2,172,566    | 13.8%         |
| Region                                                                       | 15,690,550   | 100%          |
| <i>North</i>                                                                 | 5,822,600    | 37.1%         |
| <i>South &amp; East</i>                                                      | 2,144,612    | 13.7%         |
| <i>Midlands</i>                                                              | 5,129,125    | 32.7%         |
| <i>London</i>                                                                | 2,594,213    | 16.5%         |
| <b>GP practice characteristics</b>                                           |              |               |
| % patients typically able to get an<br>appointment per practice (39.9%-100%) | 15,629,833   | 84.0%         |
| Number of FTEs per practice<br>(0.02-34.1)                                   | 14,877,337   | 5.6 (3.7)     |
| <b>Call characteristics</b>                                                  |              |               |

|    |                          |            |             |
|----|--------------------------|------------|-------------|
| 1  |                          |            |             |
| 2  |                          |            |             |
| 3  |                          |            |             |
| 4  | Call had clinical input  | 16,563,946 | 21.6%       |
| 5  | (yes=1, no=0)            |            |             |
| 6  |                          |            |             |
| 7  |                          |            |             |
| 8  | Call duration in minutes | 16,563,946 | 15.4 (22.6) |
| 9  | (0-189.7)                |            |             |
| 10 |                          |            |             |
| 11 |                          |            |             |
| 12 |                          |            |             |
| 13 |                          |            |             |
| 14 |                          |            |             |
| 15 |                          |            |             |
| 16 |                          |            |             |
| 17 |                          |            |             |
| 18 |                          |            |             |
| 19 |                          |            |             |
| 20 |                          |            |             |
| 21 |                          |            |             |
| 22 |                          |            |             |
| 23 |                          |            |             |
| 24 |                          |            |             |
| 25 |                          |            |             |
| 26 |                          |            |             |
| 27 |                          |            |             |
| 28 |                          |            |             |
| 29 |                          |            |             |
| 30 |                          |            |             |
| 31 |                          |            |             |
| 32 |                          |            |             |
| 33 |                          |            |             |
| 34 |                          |            |             |
| 35 |                          |            |             |
| 36 |                          |            |             |
| 37 |                          |            |             |
| 38 |                          |            |             |
| 39 |                          |            |             |
| 40 |                          |            |             |
| 41 |                          |            |             |
| 42 |                          |            |             |
| 43 |                          |            |             |
| 44 |                          |            |             |
| 45 |                          |            |             |
| 46 |                          |            |             |
| 47 |                          |            |             |
| 48 |                          |            |             |
| 49 |                          |            |             |
| 50 |                          |            |             |
| 51 |                          |            |             |
| 52 |                          |            |             |
| 53 |                          |            |             |
| 54 |                          |            |             |
| 55 |                          |            |             |
| 56 |                          |            |             |
| 57 |                          |            |             |
| 58 |                          |            |             |
| 59 |                          |            |             |
| 60 |                          |            |             |

---

For peer review only

**STROBE 2007 (v4) checklist of items to be included in reports of observational studies in epidemiology\***  
**Checklist for cohort, case-control, and cross-sectional studies (combined)**

| Section/Topic             | Item # | Recommendation                                                                                                                                                                                                                                                                                                                                                                                                                                                         | Reported on page # |
|---------------------------|--------|------------------------------------------------------------------------------------------------------------------------------------------------------------------------------------------------------------------------------------------------------------------------------------------------------------------------------------------------------------------------------------------------------------------------------------------------------------------------|--------------------|
| Title and abstract        | 1      | (a) Indicate the study's design with a commonly used term in the title or the abstract                                                                                                                                                                                                                                                                                                                                                                                 | 1                  |
|                           |        | (b) Provide in the abstract an informative and balanced summary of what was done and what was found                                                                                                                                                                                                                                                                                                                                                                    | 1                  |
| <b>Introduction</b>       |        |                                                                                                                                                                                                                                                                                                                                                                                                                                                                        |                    |
| Background/rationale      | 2      | Explain the scientific background and rationale for the investigation being reported                                                                                                                                                                                                                                                                                                                                                                                   | 2                  |
| Objectives                | 3      | State specific objectives, including any pre-specified hypotheses                                                                                                                                                                                                                                                                                                                                                                                                      | 3                  |
| <b>Methods</b>            |        |                                                                                                                                                                                                                                                                                                                                                                                                                                                                        |                    |
| Study design              | 4      | Present key elements of study design early in the paper                                                                                                                                                                                                                                                                                                                                                                                                                | 3                  |
| Setting                   | 5      | Describe the setting, locations, and relevant dates, including periods of recruitment, exposure, follow-up, and data collection                                                                                                                                                                                                                                                                                                                                        | 3                  |
| Participants              | 6      | (a) <i>Cohort study</i> —Give the eligibility criteria, and the sources and methods of selection of participants. Describe methods of follow-up<br><i>Case-control study</i> —Give the eligibility criteria, and the sources and methods of case ascertainment and control selection. Give the rationale for the choice of cases and controls<br><i>Cross-sectional study</i> —Give the eligibility criteria, and the sources and methods of selection of participants | 4                  |
|                           |        | (b) <i>Cohort study</i> —For matched studies, give matching criteria and number of exposed and unexposed<br><i>Case-control study</i> —For matched studies, give matching criteria and the number of controls per case                                                                                                                                                                                                                                                 |                    |
| Variables                 | 7      | Clearly define all outcomes, exposures, predictors, potential confounders, and effect modifiers. Give diagnostic criteria, if applicable                                                                                                                                                                                                                                                                                                                               | 4                  |
| Data sources/ measurement | 8*     | For each variable of interest, give sources of data and details of methods of assessment (measurement). Describe comparability of assessment methods if there is more than one group                                                                                                                                                                                                                                                                                   | 4, 5               |
| Bias                      | 9      | Describe any efforts to address potential sources of bias                                                                                                                                                                                                                                                                                                                                                                                                              | 4                  |
| Study size                | 10     | Explain how the study size was arrived at                                                                                                                                                                                                                                                                                                                                                                                                                              | 3                  |
| Quantitative variables    | 11     | Explain how quantitative variables were handled in the analyses. If applicable, describe which groupings were chosen and why                                                                                                                                                                                                                                                                                                                                           | 4, 5               |
| Statistical methods       | 12     | (a) Describe all statistical methods, including those used to control for confounding                                                                                                                                                                                                                                                                                                                                                                                  | 6, 8               |
|                           |        | (b) Describe any methods used to examine subgroups and interactions                                                                                                                                                                                                                                                                                                                                                                                                    | 8                  |
|                           |        | (c) Explain how missing data were addressed                                                                                                                                                                                                                                                                                                                                                                                                                            | 3                  |
|                           |        | (d) <i>Cohort study</i> —If applicable, explain how loss to follow-up was addressed<br><i>Case-control study</i> —If applicable, explain how matching of cases and controls was addressed                                                                                                                                                                                                                                                                              | -                  |

|                          |     |                                                                                                                                                                                                              |          |
|--------------------------|-----|--------------------------------------------------------------------------------------------------------------------------------------------------------------------------------------------------------------|----------|
|                          |     | <i>Cross-sectional study</i> —If applicable, describe analytical methods taking account of sampling strategy                                                                                                 |          |
|                          |     | (e) Describe any sensitivity analyses                                                                                                                                                                        | -        |
| <b>Results</b>           |     |                                                                                                                                                                                                              |          |
| Participants             | 13* | (a) Report numbers of individuals at each stage of study—eg numbers potentially eligible, examined for eligibility, confirmed eligible, included in the study, completing follow-up, and analysed            | 3        |
|                          |     | (b) Give reasons for non-participation at each stage                                                                                                                                                         | -        |
|                          |     | (c) Consider use of a flow diagram                                                                                                                                                                           | 4        |
| Descriptive data         | 14* | (a) Give characteristics of study participants (eg demographic, clinical, social) and information on exposures and potential confounders                                                                     | Table S1 |
|                          |     | (b) Indicate number of participants with missing data for each variable of interest                                                                                                                          | Table S1 |
|                          |     | (c) <i>Cohort study</i> —Summarise follow-up time (eg, average and total amount)                                                                                                                             | -        |
| Outcome data             | 15* | <i>Cohort study</i> —Report numbers of outcome events or summary measures over time                                                                                                                          |          |
|                          |     | <i>Case-control study</i> —Report numbers in each exposure category, or summary measures of exposure                                                                                                         |          |
|                          |     | <i>Cross-sectional study</i> —Report numbers of outcome events or summary measures                                                                                                                           | 5, 6     |
| Main results             | 16  | (a) Give unadjusted estimates and, if applicable, confounder-adjusted estimates and their precision (eg, 95% confidence interval). Make clear which confounders were adjusted for and why they were included | 6, 7     |
|                          |     | (b) Report category boundaries when continuous variables were categorized                                                                                                                                    | 7        |
|                          |     | (c) If relevant, consider translating estimates of relative risk into absolute risk for a meaningful time period                                                                                             | 7        |
| Other analyses           | 17  | Report other analyses done—eg analyses of subgroups and interactions, and sensitivity analyses                                                                                                               | 8, 9     |
| <b>Discussion</b>        |     |                                                                                                                                                                                                              |          |
| Key results              | 18  | Summarise key results with reference to study objectives                                                                                                                                                     | 10       |
| Limitations              | 19  | Discuss limitations of the study, taking into account sources of potential bias or imprecision. Discuss both direction and magnitude of any potential bias                                                   | 10       |
| Interpretation           | 20  | Give a cautious overall interpretation of results considering objectives, limitations, multiplicity of analyses, results from similar studies, and other relevant evidence                                   | 10       |
| Generalisability         | 21  | Discuss the generalisability (external validity) of the study results                                                                                                                                        | 10       |
| <b>Other information</b> |     |                                                                                                                                                                                                              |          |
| Funding                  | 22  | Give the source of funding and the role of the funders for the present study and, if applicable, for the original study on which the present article is based                                                | 12       |

\*Give information separately for cases and controls in case-control studies and, if applicable, for exposed and unexposed groups in cohort and cross-sectional studies.

**Note:** An Explanation and Elaboration article discusses each checklist item and gives methodological background and published examples of transparent reporting. The STROBE checklist is best used in conjunction with this article (freely available on the Web sites of PLoS Medicine at <http://www.plosmedicine.org/>, Annals of Internal Medicine at <http://www.annals.org/>, and Epidemiology at <http://www.epidem.com/>). Information on the STROBE Initiative is available at [www.strobe-statement.org](http://www.strobe-statement.org).



# BMJ Open

## Identifying the predictors of avoidable emergency department attendance after contact with the NHS 111 phone service: Analysis of 16.6 million calls to 111 in England in 2015-17

|                                 |                                                                                                                                                                                                                    |
|---------------------------------|--------------------------------------------------------------------------------------------------------------------------------------------------------------------------------------------------------------------|
| Journal:                        | <i>BMJ Open</i>                                                                                                                                                                                                    |
| Manuscript ID                   | bmjopen-2019-032043.R1                                                                                                                                                                                             |
| Article Type:                   | Original research                                                                                                                                                                                                  |
| Date Submitted by the Author:   | 30-Dec-2019                                                                                                                                                                                                        |
| Complete List of Authors:       | Egan, Mark; The Behavioural Insights Team, Murar, Filip; The Behavioural Insights Team, Lawrence, James; The Behavioural Insights Team Burd, Hannah; The Behavioural Insights Team                                 |
| <b>Primary Subject Heading</b>: | Emergency medicine                                                                                                                                                                                                 |
| Secondary Subject Heading:      | Health policy                                                                                                                                                                                                      |
| Keywords:                       | ACCIDENT & EMERGENCY MEDICINE, HEALTH SERVICES ADMINISTRATION & MANAGEMENT, Organisation of health services < HEALTH SERVICES ADMINISTRATION & MANAGEMENT, Rationing < HEALTH SERVICES ADMINISTRATION & MANAGEMENT |
|                                 |                                                                                                                                                                                                                    |

SCHOLARONE™  
Manuscripts



I, the Submitting Author has the right to grant and does grant on behalf of all authors of the Work (as defined in the below author licence), an exclusive licence and/or a non-exclusive licence for contributions from authors who are: i) UK Crown employees; ii) where BMJ has agreed a CC-BY licence shall apply, and/or iii) in accordance with the terms applicable for US Federal Government officers or employees acting as part of their official duties; on a worldwide, perpetual, irrevocable, royalty-free basis to BMJ Publishing Group Ltd ("BMJ") its licensees and where the relevant Journal is co-owned by BMJ to the co-owners of the Journal, to publish the Work in this journal and any other BMJ products and to exploit all rights, as set out in our [licence](#).

The Submitting Author accepts and understands that any supply made under these terms is made by BMJ to the Submitting Author unless you are acting as an employee on behalf of your employer or a postgraduate student of an affiliated institution which is paying any applicable article publishing charge ("APC") for Open Access articles. Where the Submitting Author wishes to make the Work available on an Open Access basis (and intends to pay the relevant APC), the terms of reuse of such Open Access shall be governed by a Creative Commons licence – details of these licences and which [Creative Commons](#) licence will apply to this Work are set out in our licence referred to above.

Other than as permitted in any relevant BMJ Author's Self Archiving Policies, I confirm this Work has not been accepted for publication elsewhere, is not being considered for publication elsewhere and does not duplicate material already published. I confirm all authors consent to publication of this Work and authorise the granting of this licence.

1  
2  
3  
4  
5  
6  
7  
8 **Title**  
9

10 Identifying the predictors of avoidable emergency department attendance after contact  
11 with the NHS 111 phone service: Analysis of 16.6 million calls to 111 in England in  
12 2015-17  
13  
14

15  
16 **Authors**

17 Mark Egan\*<sup>1</sup>, Filip Murar<sup>1</sup>, James Lawrence<sup>1</sup>, Hannah Burd<sup>1</sup>  
18

19  
20 \* Correspondence: [mark.egan@bi.team](mailto:mark.egan@bi.team)  
21

22  
23 Author Affiliations: <sup>1</sup>The Behavioural Insights Team, London  
24  
25  
26  
27  
28  
29  
30  
31  
32  
33  
34  
35  
36  
37  
38  
39  
40  
41  
42  
43  
44  
45  
46  
47  
48  
49  
50  
51  
52  
53  
54  
55  
56  
57  
58  
59  
60

## Abstract

**Objectives:** To measure the frequency of patients making avoidable emergency department (ED) attendances after contact with NHS 111, and to examine whether these attendances can be predicted reliably.

**Design:** Analysis of 16,563,946 calls made to 111, where each call was linked with a record of whether the patient attended ED within 24 hours.

**Setting:** All regions of England from March 2015 to October 2017.

**Participants and data:** Our main regression model used a sample of 10,954,783 calls, each with detailed patient-level information.

**Main outcome:** Whether patients made an unadvised, nonurgent Type 1 ED (“avoidable”) attendance within 24 hours of calling 111.

**Results:** Of 16,563,946 calls to 111, 12,894,561 (77.8%) were not advised to go to ED (i.e. they were advised to either attend primary care, attend another non-ED healthcare service, or to self care). Of the calls where the patient was not advised to go to the ED, 691,783 (5.4%) resulted in the patient making an avoidable ED attendance within 24 hours.

Among other factors, calls were less likely to result in these attendances when they received clinical input (adjusted odds ratio [OR] 0.52, 95% CI 0.51-0.53), but were more likely when the patient was female (OR 1.07, 95% CI 1.06-1.08) or aged 0-4 (OR 1.34, 95% CI 1.33-1.35).

**Conclusions:** For every 20 calls where 111 did not advise people to attend the ED, 1 resulted in avoidable ED attendance within 24 hours. These avoidable attendances could be predicted, to a certain extent, based on call characteristics. It may be possible to use this information to help 111 call-handlers identify which callers are at higher risk of these attendances.

## Strengths and limitations of this study

- The analysis relies on a large national-level dataset containing 47% of all 111 calls in England in the study period
- It adjusts for a large set of covariates known to be predictive of avoidable ED attendances.
- However, other potentially important predictors of health behaviour, such as health history or other interactions with healthcare providers, were not available in the data.
- We conducted both a conventional (OLS and logistic) regression and a predictive (gradient-boosting) analysis.

## Introduction

9.7 million (50%) of the 19.4 million attendances made at hospital emergency departments (EDs) in England in 2016-17 resulted in the patient receiving either no treatment, or advice and guidance only.<sup>1</sup> This incurred a total cost to the NHS of over £500 million, at a time when “pressures on the NHS are greater than they have ever been” (see Supplement A for the derivation of these figures).<sup>2,3</sup> The low-intensity care received by these patients suggests at least some could have been treated safely elsewhere (e.g. GP practice, pharmacy, or at home), at lower cost to the healthcare system.

One way to potentially reduce the number of nonurgent ED attendances is by encouraging greater use of the 111 service. NHS 111 is a free, non-emergency healthcare telephone line in Britain which aims to ensure that callers are seen at the “right place, first time.”<sup>4</sup> Call-handlers for the 111 service assess callers’ health problems using a clinically-validated triage algorithm (‘NHS Pathways’),<sup>5</sup> then either dispatch an ambulance or recommend the caller attend ED, or advise the caller to go to primary care, attend another healthcare service, or to self-care.

Given that 111 received 16 million calls in England in 2017-18,<sup>6</sup> the service is well-placed to direct large numbers of patients with nonurgent health problems to seek treatment outside the ED. However, it is not clear how often calls produce this result in practice. An evaluation of 111 in its first year of operation found it had no statistically significant impact on ED attendance rates.<sup>7</sup> More recent work has found that the Pathways algorithm may recommend ED attendance more often than necessary,<sup>8</sup> and that some 111 staff believe the service has increased the number of nonurgent calls compared to previous out-of-hours primary care services.<sup>9</sup>

Although there have been several big-data studies examining the predictors of nonurgent ED attendance rates in England,<sup>10,11,12</sup> it has only recently become possible to do large-scale analysis of linked 111/ED data (i.e. data which links individual 111 calls with a record of whether that caller went on to attend ED).<sup>13</sup> This linked data makes it possible to examine how often patients end up making nonurgent ED attendances after calling

1  
2  
3 **111.** To date, one other study has been published using this linked data: it examined a  
4 dataset of 10,356 callers across three areas of North West London and found that 15%  
5 of callers advised by 111 to manage their health needs at home attended an ED within  
6 10 hours (this rate was lower when patients were given GP out-of-hours appointments or  
7 when the 111 call received input from a clinical supervisor).<sup>14</sup>  
8  
9

10  
11 This study uses a national-level linked 111-ED dataset to examine how often 111 callers  
12 end up making unadvised, nonurgent Type 1 (henceforth ‘avoidable’) ED attendances  
13 within 24 hours of their call, and to examine the predictors of these attendances. We do  
14 this using a dataset of 16,563,946 calls made to 111 from March 2015 to October 2017,  
15 where each call contained patient-level information and a record of whether the patient  
16 attended ED within 24 hours.  
17  
18

## 19 20 21 **Methods**

22 **Study design.** The data initially contained 18,127,605 observations, where each row was  
23 a call made to 111 between 31 March 2015 and 31 October 2017. This represents  
24 almost half (47%) of the 38,585,200 million calls made to 111 between March 2015  
25 and October 2017.<sup>6</sup> We were not able to access the full universe of calls as data from  
26 some 111 sites had not yet undergone the data linkage procedures necessary for  
27 inclusion in the analysis. For this same reason, we were not able to access calls outside  
28 the stated time period.” Each call was linked with a Secondary Use Services (SUS) record  
29 of whether the patient attended ED within 24 hours of the 111 call. This linkage was  
30 conducted by researchers at NHS England and patients’ NHS number was used as the  
31 matching variable. We used logistic and ordinary least squares (OLS) regressions and a  
32 gradient boosted decision tree model to assess the extent to which we could predict  
33 whether the call would result in an avoidable ED attendance within 24 hours. All analyses  
34 were performed in Stata 14 and R 3.5.0. The analysis was considered exploratory and  
35 consequently did not examine pre-specified hypotheses.  
36  
37  
38  
39  
40  
41

42 **Data cleaning.** We excluded rows missing the date / time of the 111 call (n = 52,394),  
43 final disposition code (n = 878,461), which had disposition codes<sup>15</sup> indicating the call  
44 was not relevant to our research question (n = 167,182), missing patient’s gender (n  
45 = 246,144), missing patient age or where age was over 110 years (n = 46,656), and  
46 calls whose duration was above the 99th percentile (more than 190 minutes) as these  
47 were presumed to be data errors (n = 172,822). Note that the following final disposition  
48 at the end of 111 (recorded using ‘Dx’ codes) were considered irrelevant to the  
49 research question: Dx78 (“Receive Report of Results or Tests from Laboratory”), Dx83  
50 (“Clinician Home Management of Dying Individual (Expected)”), Dx91 (“Unexpected  
51 Death”), Dx95 (“The Call is Closed with No Further Action Required, Wrong Service  
52 Called”), Dx116 (“Speak to the Primary Care Service within 6 hours for Expected  
53 Death”), and Dx117 (“Speak to a Primary Care Service within 1 hour for Palliative  
54 Care”).  
55  
56  
57  
58  
59  
60

1  
2  
3  
4 This reduced the sample to 16,563,946 triaged calls, from which we produced  
5 descriptive statistics. Our main regression model used a smaller sample of 10,954,783  
6 calls, as this retained only rows with complete information on the outcome measure and  
7 all control variables. Comparing the former and the latter samples, we saw a slight  
8 increase in the mean value of the outcome variable (from 5.4% to 5.6%), the proportion  
9 of calls between midnight and 4 am (a 5.2% relative increase), the proportion of calls  
10 that received clinical input (a 6.1% increase), the proportion of calls that happened on a  
11 bank holiday and in the Christmas period (6.3% and 5.8%, respectively), and a decrease  
12 in the proportion of calls from patients based in London (a 12.5% decrease); all other  
13 relative changes were smaller than 3.0%. The regression sample is therefore very similar  
14 to the sample used for descriptive statistics, with a small number of notable deviations.  
15 Missing-data imputation was not performed due to computational infeasibility, given the  
16 size of the dataset.  
17  
18  
19  
20  
21  
22

23 **Outcome measure.** Our outcome measure was a binary indicator of whether a patient  
24 made an avoidable ED attendance within 24 hours of calling 111. Figure 1 shows how  
25 we coded the outcome measure. We defined an ED attendance as “avoidable” if, after  
26 being told by 111 to do something other than go to the ED, the patient attended ED within  
27 24 hours and was assigned Healthcare Resource Group (HRG) treatment codes VB07Z  
28 (“category 2 investigation with category 2 treatment”), VB08Z (“category 2 investigation  
29 with category 1 treatment”), VB09Z (“category 1 investigation with category 1-2  
30 treatment”), or VB11Z (“no investigation with no significant treatment”),<sup>16</sup> and was not  
31 admitted, not referred to another healthcare specialist by the ED, and did not die in the  
32 ED department. These HRG codes represent relatively low-intensity health assessments  
33 and were therefore considered more likely to capture attendances which could have been  
34 safely treated elsewhere - with the caveat that it is not certain that all these attendances  
35 should certainly not have attended the ED (e.g. some patients may have attended the ED  
36 at the explicit instruction of a healthcare professional, even though they ended up  
37 receiving low intensity treatment). This particular list of HRG codes was adapted from  
38 those used in a 2017 study by the North of England Commissioning Support Unit which  
39 also examined avoidable admissions.<sup>17</sup>  
40  
41  
42  
43  
44  
45

#### 46 **Figure 1. How the outcome measure was coded.**

47 [figure 1]

48 **Control measures.** Our analysis used 18 control variables, shown in past research to be  
49 important predictors of ED attendance in England, which fell into five broad categories:

- 50  
51 - **2 patient characteristics:** (i) a continuous measure of patient age and (ii) a binary  
52 measure of patient gender.  
53  
54 - **5 geographic characteristics:** (iii) a binary indicator of whether the patient was  
55 from a rural vs urban area,<sup>18</sup> (iv) a categorical variable identifying what region of  
56 England the patient was from (North, Midlands, South & East, or London), (v) the  
57 distance ratio between the patient’s local area and the nearest ED relative to a GP  
58 (included under the assumption that a patient’s decision to see a GP or go to the  
59  
60

ED is likely to be influenced by the relative ease of accessing these two locations), (vi) the deprivation of the patient's local area (measured in quintiles using 2015 indices of multiple deprivation scores), and (vii) a categorical indicator of which of the 40 different 111 sites present in the data handled the call, to account for any unobserved variation in the way different 111 sites interact with patients.<sup>19</sup>

- **2 GP practice characteristics:** For each GP practice in the data, which was recorded at the individual-patient level, we included (viii) a variable from the GP Patient Survey which recorded the proportion of patients saying "Yes" or "Yes, but I had to call back closer to or on the day I wanted the appointment" in response to "Were you able to get an appointment to see or speak to someone?". We also (ix) included an indicator of the number of full-time-equivalent (FTE) GPs at each practice.<sup>20</sup>
- **3 call characteristics:** (x) duration of the 111 call in minutes, (xi) a binary variable indicating whether the call had clinical input from a doctor, nurse, or other clinician (21% of calls did involve the patient speaking to a healthcare professional like this), and (xii) which of the 96 NHS Pathways disposition codes the patient was assigned at the end of the call.
- **6 temporal characteristics:** Using the date and time the call was made to 111, we constructed variables for (xiii) hour of the day, (xiv) day of week, (xv) month, (xvi) year (2015, 2016, or 2017), and binary indicators for whether the day was a (xvii) bank holiday, or (xviii) spanned the December 24-26 period.

The distance ratio, i.e. variable (v) was calculated as the average travel time by public transport and/or walking to the nearest hospital relative to the nearest GP and included under the assumption that a patient's decision to see a GP or go to the ED is likely to be influenced by the relative ease of accessing these two locations.<sup>21,22</sup>

Deprivation, i.e. variable (vi), was measured using 2015 indices of multiple deprivation (IMD) scores, which were matched to patients' local areas using their LSOA code. While deprivation is typically measured using the aggregate IMD score compiled from 7 different subdomain measures (e.g. deprivation for income, deprivation for health, deprivation for employment, etc), it is not entirely appropriate to use this aggregate measure when predicting ED attendance. This is because the health score, which comprises 13.5% of the total IMD score, itself incorporates local ED attendance rates as a measure of local health deprivation.<sup>23</sup> This sort of mathematical coupling (i.e. using a score which includes ED attendances to predict ED attendances) can lead to spurious correlations in statistical assessment. We therefore followed an established procedure to construct an alternative aggregate IMD score which excluded the health domain but retained the other six deprivation domains.<sup>24</sup>

Ease of securing a GP appointment, i.e. variable (viii) relied on the GP Patient Survey (GPPS), which is a questionnaire sent to users of GP practices. It asks people to rate the performance of their GP practice on dimensions such as quality of care, satisfaction with opening hours, and a subjective assessment of how easy it is to get



1  
2  
3 an appointment. We retained only data for GP practices who had received at least 50  
4 responses to these questionnaires. In order to maximise sample size, we took the  
5 average score for the GP characteristic variables across the three GPPS waves  
6 published in January 2016, July 2016, and July 2017.<sup>25</sup>  
7  
8  
9

10 The disposition code variable (xii) indexed 96 different disposition codes present in the  
11 data which contained at least 30 observations. These codes used the standard "Dx"  
12 coding format (e.g. "Dx14 = Speak to a Primary Care Service within 12 hours") used  
13 by the 111 services.<sup>15</sup> These disposition codes were the ones recorded by the call  
14 handler or clinical advisor who initially managed the 111 call, but in some cases,  
15 patients will have gone on to have further interactions with the 111 service after this  
16 disposition was assigned. For example, they may have received a call-back from  
17 another healthcare professional, who may have assigned them a different disposition.  
18  
19  
20

21 Detailed descriptive statistics for each of the control variables can be found in table S1  
22 in Supplement B.  
23  
24

25 Our regression specification consisted of a linear combination of all the control  
26 variables and did not include any interactions or transformations.  
27  
28

29 *Patient and Public Involvement. Patients were not involved in the design of this study*  
30 *as it involved only observational analysis of an anonymised, pre-existing, routinely-*  
31 *collected dataset..*  
32  
33  
34

## 35 Results

### 36 Descriptive statistics

37  
38 Figure 2 shows the ED outcomes of 16,563,946 calls in the data, broken down by NHS  
39 Pathways disposition assigned at the end of the call, and with the original number of calls  
40 normalised to 1000 for ease of interpretation. For every 1000 callers, 779 were not  
41 advised by 111 to attend ED (i.e. they were told to attend primary care, attend another  
42 service, or self-care). Of these, 83 went on to make a Type 1 ED attendance anyway within  
43 24 hours. Of these, 42 were classified as avoidable. Stated differently, for calls where  
44 patients were not advised to attend ED, 5.4% resulted in avoidable ED attendances within  
45 24 hours.  
46  
47  
48  
49  
50

51 **Figure 2. Outcomes of 16,563,946 calls made to 111 from March 2015 to October 2017.**  
52 **For ease of interpretation the total number of calls has been normalised to 1,000.**  
53

54 [figure 2.png]

55 Avoidable = Patient got Healthcare Resource Group (HRG) treatment code VB07Z ("category 2 investigation  
56 with category 2 treatment"), VB08Z ("category 2 investigation with category 1 treatment"), VB09Z  
57 ("category 1 investigation with category 1-2 treatment"), or VB11Z ("no investigation with no significant  
58 treatment"), and was not admitted, not referred to another healthcare specialist by the ED, and did not die  
59 in the ED department.  
60

## Regression analyses

Table 1 shows the results of our logistic and OLS regression analyses. Column 1 shows exponentiated logistic regression coefficients, which can be interpreted as odds ratios. Column 2 shows the coefficients of an OLS regression (i.e. a linear probability model) with the same specification – although problematic, as it violates the assumption of non-negative probabilities, it provides a more easily interpretable way of assessing the strengths of the observed associations.

Notable results include that calls were 3.65 percentage points (95% CI -3.76, -3.54) less likely to result in avoidable attendances (relative to a baseline of 5.6%) when the call had clinical input, and 0.8 points less likely (95% CI -1.0, -0.6) when the caller was registered with a GP practice where it was easier than other practices to get an appointment. Calls were 0.34 points more likely to result in these attendances when the patient was female (95% CI 0.31-0.37), 1.72 points more likely when the patient was aged 0-4 (95% CI 1.68-1.75), and 0.17 points more likely when the patient lived in a more deprived area (95% CI 0.16-0.18).

**Table 1. Summary results of the association between 111 call characteristics and the probability of making an avoidable Type 1 ED attendance within 24 hours.**

|                                                                      | Column 1                                         | Column 2                                                 |
|----------------------------------------------------------------------|--------------------------------------------------|----------------------------------------------------------|
| <i>Variable</i>                                                      | <b>Logistic regression, odds ratios (95% CI)</b> | <b>OLS regression, percentage point changes (95% CI)</b> |
| <b><i>Patient characteristics</i></b>                                |                                                  |                                                          |
| Patient aged 0-4 (vs all other ages)                                 | 1.34***<br>(1.33, 1.35)                          | 1.72***<br>(1.68, 1.75)                                  |
| Female (vs male) patient                                             | 1.07***<br>(1.06, 1.08)                          | 0.34***<br>(0.31, 0.37)                                  |
| <b><i>Geographic characteristics</i></b>                             |                                                  |                                                          |
| Quintile of area deprivation (1 = least deprived, 5 = most deprived) | 1.03***<br>(1.03, 1.03)                          | 0.17***<br>(0.16, 0.18)                                  |
| Patient's distance to hospital relative to GP                        | 1.00<br>(1.00, 1.00)                             | 0.00<br>(-0.01, 0.01)                                    |
| Patient in rural (vs urban) area                                     | 0.91***<br>(0.90, 0.92)                          | -0.44***<br>(-0.48, -0.40)                               |

|                                                                                                                     |                         |                            |
|---------------------------------------------------------------------------------------------------------------------|-------------------------|----------------------------|
| <b>GP practice characteristics</b>                                                                                  |                         |                            |
| Effect of 10 percentage point increase in % of patients saying they can typically get an appointment at GP practice | 0.87***<br>(0.83, 0.90) | -0.79***<br>(-0.97, -0.61) |
| Effect of 10 additional FTEs at GP practice                                                                         | 0.99***<br>(0.99, 0.99) | -.03***<br>(-.04, -.03)    |
| <b>Call characteristics</b>                                                                                         |                         |                            |
| Call received clinical input (vs no input)                                                                          | 0.52***<br>(0.51, 0.53) | -3.65***<br>(-3.76, -3.54) |
| Call duration in minutes                                                                                            | 0.99***<br>(0.99, 0.99) | -0.02***<br>(-0.02, -0.02) |
| Bank holiday                                                                                                        | 0.83***<br>(0.81, 0.84) | -0.09***<br>(-0.10, -0.08) |
| Christmas period (Dec 24-26)                                                                                        | 1.03*<br>(1.00, 1.06)   | 0.13<br>(-0.02, 0.27)      |
| Additional controls?                                                                                                | Yes                     | Yes                        |
| Baseline                                                                                                            | 0.059/1                 | 5.6%                       |
| Goodness of fit                                                                                                     | AUC = 0.70              | R <sup>2</sup> = 3.4%      |
| Observations                                                                                                        | 10,954,783              | 10,954,783                 |

Additional controls = hour of day, day of week, month of year, year, region of England, 111 site, and disposition code assigned to the call.  
\*  $p < .05$ , \*\*  $p < .01$ , \*\*\*  $p < .001$ .

### Predictive modelling

We next tested whether we could improve our ability to predict which 111 calls would result in avoidable ED attendances by running a gradient boosted tree model (GBM).<sup>26</sup> A GBM models the outcome measure as the result of a series of decision trees. Each tree attempts to identify areas where the others make poor predictions and correct for that, resulting in strong predictive performance even in the presence of complex nonlinear relationships or interactions between the predictors and the outcome (a situation in which other techniques such as OLS may not perform so well). It is one of the best-performing predictive algorithms for tabular data.<sup>27</sup> We built the GBM using a training subset of the data (a random selection of 80% of the 10,954,783 rows) and evaluated its out-of-sample predictions using a test subset (the remaining 20% of rows).

As a test of the GBM's incremental accuracy, we applied the same train-test procedure with the logistic regression model described in Table 1, and compared the predictive ability of the two models using an area-under-curve (AUC) score. We found the AUC was 0.70 for the logistic regression and 0.73 for the GBM (note that a model which randomly guesses the outcome would have an AUC of 0.5 and a model which makes perfect predictions would have an AUC of 1.0). This surprisingly small improvement implies that the ability of the GBM to automatically find nonlinear relationships and interactions resulted in only slightly more accurate predictions about which 111 callers would end up making avoidable ED attendances, and still felt short of reaching very high levels of predictive accuracy (as would be indicated by an AUC score of 0.80 or higher).

Table 2 shows the next result from the GBM — a quantification of the relative importance of the different types of variables in our analysis. The importance of a variable is defined as the improvement in log likelihood which is attributable to each decision (in the decision trees) made using that variable. These are then renormalised to sum to 100%, to give the relative importance. Of the variation which we could explain, 91% was accounted for by a combination of the call characteristics, geographic characteristics, and temporal characteristics, and the remaining 9% was explained by patient-level and GP-practice characteristics.

**Table 2. Decomposition of the relative importance of different characteristics in predicting avoidable ED attendances after a 111 call.**

|                                               | Proportion of explainable deviance in the outcome measure captured by variable type |
|-----------------------------------------------|-------------------------------------------------------------------------------------|
| <b>Call characteristics</b>                   | <b>51.5%</b>                                                                        |
| NHS Pathways disposition assigned to 111 call | 42.7%                                                                               |
| Call duration                                 | 7.7%                                                                                |
| Clinical input                                | 1.1%                                                                                |
| <b>Geographic characteristics</b>             | <b>25.6%</b>                                                                        |
| 111 site                                      | 17.1%                                                                               |
| Region of England                             | 4.4%                                                                                |
| Distance from caller's home to hospital       | 2.7%                                                                                |
| Index of multiple deprivation                 | 1.1%                                                                                |
| Caller from rural (vs urban) area             | 0.5%                                                                                |
| <b>Temporal characteristics</b>               | <b>13.9%</b>                                                                        |
| Hour of day                                   | 7.4%                                                                                |

|                                      |             |
|--------------------------------------|-------------|
| Month of year                        | 3.4%        |
| Day of week                          | 2.0%        |
| Year                                 | 0.8%        |
| Bank holiday                         | 0.2%        |
| Christmas                            | 0.1%        |
| <b>Patient characteristics</b>       | <b>4.6%</b> |
| Patient aged 0-4 (vs all other ages) | 2.6%        |
| Female (vs male) patient             | 2.0%        |
| <b>GP practice characteristics</b>   | <b>4.4%</b> |
| Number of FTE employees              | 2.5%        |
| Ease of getting appointment          | 1.9%        |

Finally, we used the GBM's predictions to classify the calls into different risk categories. For every 1000 triaged calls, we classified:

- 558 as low-risk (<5% predicted probability of avoidable ED attendance), of which 15 (2.6%) resulted in an avoidable ED attendance,
- 328 as medium-risk (5%–10% predicted probability of avoidable ED attendance), of which 23 (7.0%) resulted in an avoidable ED attendance, and
- 114 as high-risk (>10% predicted probability of avoidable ED attendance), of which 19 (16.2%) resulted in an avoidable ED attendance.

Using this (somewhat arbitrary) classification, high-risk calls were 6.2 times more likely than low-risk calls to result in avoidable ED attendances (although a large majority of even the high-risk calls did not result in these attendances).

## Discussion

Our analysis of the largest yet published dataset of linked 111 calls and subsequent ED attendances found that, of patients not advised by 111 to go to ED, around 1 in 20 (5.4%) made an avoidable Type 1 ED attendance within 24 hours of the call. Using the NHS national tariff charges present in the data for each ED attendance, we estimate that these avoidable attendances incurred tariff costs of £65 million (£2.1 million per month) over the March 2015 to October 2017 period covered in our data. If we extrapolate this 5.4% incidence rate of avoidable attendances to all 38,585,200 calls made to 111 between March 2015 and October 2017 (i.e. including calls not in our data), this implies £58.8m in tariff charges were incurred per year by avoidable ED attendances. The cost to the NHS as a whole, however, is likely smaller than this, since patients who do not visit a Type 1 ED may instead attend another (albeit potentially cheaper) part of the healthcare system.

1  
2  
3  
4  
5 Although our analysis could not answer the counterfactual of "would overall avoidable ED  
6 attendances be higher or lower if the 111 service did not exist?", our findings do at least  
7 suggest that relatively few 111 patients end up making unadvised attendances at ED  
8 which could likely have been safely treated elsewhere. However, Figure 2 also found that  
9 a surprisingly large proportion of patients who were advised by 111 to attend the ED did  
10 nonetheless end up receiving low-intensity treatment (such that even these attendances  
11 were classified as 'avoidable' as defined in this study). Clarifying the precise nature of  
12 these 'advised and avoidable' attendances was outside the scope of this study but  
13 warrants further investigation.  
14  
15

16  
17 The key strengths of this study were: our use of a national-level dataset containing over  
18 16 million calls to 111 (47% of the total number of 111 calls made over the study period);  
19 our use of an extensive set of covariates known to be predictive of avoidable ED  
20 attendances, and; our combination of both conventional (OLS, logistic regression) and  
21 cutting-edge (GBM) analytic techniques. One of our key findings – that calls which  
22 received clinical input were much less likely to result in avoidable ED attendance –  
23 replicated the same association found in the only other paper to date examining linked  
24 111-ED data.<sup>28</sup> Key limitations included the relatively crude criteria we used to define ED  
25 attendances as 'avoidable' (i.e. this relied principally on post-hoc ED disposition codes  
26 and did not incorporate any clinical notes which could have provided more nuanced  
27 information about the patient's health issue), our lack of controls for other  
28 characteristics likely predictive of health behaviour (e.g. patients' education, risk  
29 aversion, and health history), and the fact that the data did not record interactions patient  
30 may have had with 111 soon after their initial call (e.g. a 111 call-handler could have  
31 arranged for the patient to receive a call-back from a clinical advisor or out-of-hours GP  
32 within a few hours of their initial call, but this subsequent call would not be recorded in  
33 the data we examined).  
34  
35  
36  
37  
38  
39

40 After adjusting for the full set of covariates, which included information about the time,  
41 duration and location of the call, the age and gender of the caller, and the caller's GP  
42 practice, we classified calls into low-, medium-, and high-risk for avoidable ED  
43 attendance, and found that high-risk calls were 6 times more likely than low-risk ones to  
44 result in avoidable attendances. This suggests that it may be possible to use existing  
45 data resources to construct a tool which helps 111 call-handlers identify callers at high  
46 risk of these attendances — similar to how traffic light systems are used to identify  
47 gradations of risk in other health assessments.<sup>29</sup> Call handlers could then provide extra  
48 resource for these calls (e.g. spend more time providing self-care instructions or  
49 assistance securing a GP appointment).  
50  
51  
52  
53  
54

55 In terms of practical implications of this research, we suggest that analysis of newer  
56 editions of the dataset examined in this report could be used to (i) provide tailored  
57 feedback to individual 111 call handlers and local leaders of 111 services regarding the  
58 proportion of their calls which result in avoidable ED attendance soon afterwards, and (ii)  
59  
60

1  
2  
3 communicating which calls are at high-risk of an avoidable ED attendance (e.g.  
4 potentially using a traffic-light warning system where red warnings are used to identify  
5 high-risk calls) to 111 call-handlers, who could then provide extra resource for these  
6 patients (e.g. by spending extra time providing self-care instructions or guidance on how  
7 best to secure a GP appointment).  
8  
9

10  
11 Future research could seek to replicate and expand our analysis as more and more linked  
12 data becomes available. Given that our analysis included only 47% of 111 calls made in  
13 the examined time period, it is possible that selection effects may be distorting our own  
14 findings (e.g. perhaps 111 sites with lower avoidable attendance rates were more likely  
15 to provide their data to NHS Digital). Future work could also aim to test whether avoidable  
16 attendance rates could be reduced by providing a traffic light warning system for 111 call  
17 handlers, or by providing regular feedback to individual call-handlers or 111 sites about  
18 the avoidable attendance rate associated with their calls.  
19  
20  
21  
22  
23  
24  
25  
26  
27  
28  
29  
30  
31  
32  
33  
34  
35  
36  
37  
38  
39  
40  
41  
42  
43  
44  
45  
46  
47  
48  
49  
50  
51  
52  
53  
54  
55  
56  
57  
58  
59  
60

1  
2  
3 **Acknowledgements.** The authors thank the members of the NHS England Research &  
4 Evaluation team, particularly Holly Krelle and Dilwyn Sheers for providing access to the  
5 data and feedback on the analytic strategy. We would also like to thank the study's  
6 sponsors: Ed Rose and colleagues in NHS England's Integrated Urgent Care team.  
7 Michael Hallsworth of the Behavioural Insights Team supported the conception of the  
8 study.  
9

10  
11 **Author contributions.** HB conceived the study and designed it with help from ME. ME and  
12 JL designed the analytical strategy. ME and FM performed the analysis and wrote the first  
13 draft of the paper. All authors assisted in the interpretation of data and creation of the  
14 final draft. ME is the guarantor.

15 **Funding.** The study was funded by NHS England.

16 **Competing interests.** None.

17  
18 **Ethics approval.** The study was approved by both the Health Research Authority's London  
19 - Fulham Research Ethics Committee (REC reference 17/LO/1569) and Confidentiality  
20 Advisory Group (CAG reference 17/CAG/0159).

21  
22 **Data availability statement.** The data are records of 111 calls linked with Secondary Use  
23 Services (SUS) records of whether each patient attended ED within 24 hours of the call.  
24 Inquiries regarding data access should be made to the Data Services for Commissioners,  
25 Operations and Information, NHS England ([england.dataservices@nhs.net](mailto:england.dataservices@nhs.net)).

26  
27 **Disclaimer.** This is an independent report commissioned and funded by NHS England.  
28 The views expressed are not necessarily those of NHS England.

29 **Word count:** 4594

30 **Keywords:** 111 service, emergency department, avoidable visits, predictive analysis  
31

## 32 33 34 35 **References** 36 37 38 39 40 41 42 43 44 45 46 47 48 49 50 51 52 53 54 55 56 57 58 59 60



1  
2  
3  
4  
5  
6  
7  
8  
9  
10  
11  
12  
13  
14  
15  
16  
17  
18  
19  
20  
21  
22  
23  
24  
25  
26  
27  
28  
29  
30  
31  
32  
33  
34  
35  
36  
37  
38  
39  
40  
41  
42  
43  
44  
45  
46  
47  
48  
49  
50  
51  
52  
53  
54  
55  
56  
57  
58  
59  
60

---

<sup>1</sup> Hospital Accident and Emergency Activity - 2016-17, Table 19 [Internet]. NHS Digital [cited 2019 Apr 12]. Available from: <https://files.digital.nhs.uk/publication/e/7/acci-emer-atte-eng-2016-17-data.xlsx>

<sup>2</sup> National tariff payment system 2017/18 and 2018/19, Annex B, file “2017-18 A and E model”, sheet “2016-17 A&E Tariff” [Internet]. NHS Improvement [cited 2019 Apr 12]. Available from: <https://improvement.nhs.uk/resources/national-tariff-1719/>

<sup>3</sup> The NHS in 2017 [Internet]. NHS England [cited 2019 Apr 12]. Available from: <https://www.england.nhs.uk/five-year-forward-view/next-steps-on-the-nhs-five-year-forward-view/the-nhs-in-2017/>

<sup>4</sup> NHS 111 Commissioning Standards [Internet]. NHS England. 2014 Jun [cited 2019 Apr 12]. Available from: <https://www.england.nhs.uk/wp-content/uploads/2014/06/nhs111-coms-stand.pdf>

<sup>5</sup> NHS Pathways [Internet]. NHS Digital [cited 2019 Apr 12]. Available from: <https://digital.nhs.uk/services/nhs-pathways>

<sup>6</sup> Kay I. NHS 111 Minimum Data Set (MDS) [Internet]. NHS England. 2017 [cited 2019 Apr 12]. Available from: <https://www.england.nhs.uk/statistics/wp-content/uploads/sites/2/2018/07/20180712-NHS-111-MDS-time-series-to-June-2018.xlsx>

<sup>7</sup> Turner J, O’Cathain A, Knowles E, Nicholl J. Impact of the urgent care telephone service NHS 111 pilot sites: a controlled before and after study. *BMJ Open*, 2013;3(11):e003451.

<sup>8</sup> Anderson A, Roland M. Potential for advice from doctors to reduce the number of patients referred to emergency departments by NHS 111 call handlers: observational study. *BMJ Open*. 2015;5(11):e009444.

<sup>9</sup> Pope C, Turnbull J, Jones J, Prichard J, Rowsell A, Halford S. Has the NHS 111 urgent care telephone service been a success? Case study and secondary data analysis in England. *BMJ Open*. 2017;7(5):e014815.

<sup>10</sup> McHale P, Wood S, Hughes K, Bellis M, Demnitz U, Wyke S. Who uses emergency departments inappropriately and when - a national cross-sectional study using a monitoring data system. *BMC Medicine*. 2013;11(1):258.

<sup>11</sup> Cowling T, Cecil E, Soljak M, Lee J, Millett C, Majeed A, *et al*. Access to primary care and visits to emergency departments in England: a cross-sectional, population-based study. *PloS One*. 2013;8(6):e66699.

<sup>12</sup> Tammes P, Morris R, Brangan E, Checkland K, England H, Huntley A, *et al*. Exploring the relationship between general practice characteristics and attendance at walk-in centres, minor injuries units and EDs in England 2012/2013: a cross-sectional study. *Emerg Med J*. 2016;33(10):702-8.

<sup>13</sup> NHS 111 Pathways NHS number Data Provision Service [Internet]. NHS Digital [cited 2019 Apr 12]. Available from: <https://digital.nhs.uk/about-nhs-digital/corporate-information-and-documents/directions-and-data-provision-notice/data-provision-notice-dpns/nhs-111-pathways-nhs-number-data-provision-notice>

<sup>14</sup> Wolters A, Robinson C, Hargreaves D, Pope R, Maconochie I, Deeny S, Steventon A. Predictors of emergency department attendance following NHS 111 calls for children and young people: analysis of linked data. *bioRxiv*. 2018 Jan 1:237750.

<sup>15</sup> Dx Code Mapping to Disposition [Internet]. NHS England. 2015 [cited 2019 Apr 12]. Available from: <https://www.england.nhs.uk/statistics/wp-content/uploads/sites/2/2015/05/Dx-code-V13.0-mapping-to-111-publication-data-items.xlsx>

- 1  
2  
3
- 
- 4 16 Chapter Summaries, HRG4+ 2017/18 Local Payment Grouper [Internet]. NHS Digital. 2017 [cited  
5 2019 Apr 12]. Available from:  
6 [https://digital.nhs.uk/binaries/content/assets/legacy/pdf/n/i/hrg4\\_\\_201718\\_local\\_payment\\_grouper\\_chapter\\_summaries\\_v1.0.pdf](https://digital.nhs.uk/binaries/content/assets/legacy/pdf/n/i/hrg4__201718_local_payment_grouper_chapter_summaries_v1.0.pdf)  
7  
8
- 9 17 Transforming urgent and emergency care services in England [Internet]. NHS England. 2017 [cited  
10 2019 Dec 10]. Available from: <https://www.england.nhs.uk/wp-content/uploads/2017/03/uec-channel-shift-model-user-guide.pdf>  
11  
12
- 13 18 Rural Urban Classification (2011) of Lower Layer Super Output Areas in England and Wales  
14 [Internet]. Office for National Statistics. 2013 [cited 2019 Apr 12]. Available from:  
15 <https://data.gov.uk/dataset/b1165cea-2655-4cf7-bf22-dfbd3cdeb242/rural-urban-classification-2011-of-lower-layer-super-output-areas-in-england-and-wales>  
16
- 17 19 Kay I. NHS 111 Minimum Data Set (MDS), tab 'CCG to 111 Area & Provider' [Internet]. 2017 Aug  
18 [cited 2019 Apr 12]. Available from: <https://www.england.nhs.uk/statistics/wp-content/uploads/sites/2/2017/06/MDS-Web-File-National-up-to-June-2017.xlsx>, tab  
19  
20
- 21 20 Kay I. NHS 111 Minimum Data Set (MDS) [Internet]. 2017 Aug [cited 2019 Apr 12]. Available from:  
22 <https://digital.nhs.uk/catalogue/PUB30044>  
23
- 24 21 Moyce R, Corvaglia F. Travel time, destination and origin indicators for GPs by mode of travel,  
25 Lower Super Output Area (LSOA), England. Department for Transport 2018. [cited 2019 Apr 12].  
26 Available from:  
27 [https://assets.publishing.service.gov.uk/government/uploads/system/uploads/attachment\\_data/file/748220/jts0506.ods](https://assets.publishing.service.gov.uk/government/uploads/system/uploads/attachment_data/file/748220/jts0506.ods)  
28  
29
- 30 22 Moyce R, Corvaglia F. Travel time, destination and origin indicators for Hospitals by mode of travel,  
31 Lower Super Output Area (LSOA), England [Internet]. Department for Transport. 2018 [cited 2019 Apr  
32 12]. Available from:  
33 [https://assets.publishing.service.gov.uk/government/uploads/system/uploads/attachment\\_data/file/748220/jts0506.ods](https://assets.publishing.service.gov.uk/government/uploads/system/uploads/attachment_data/file/748220/jts0506.ods)  
34  
35
- 36 23 Smith T, Noble M, Noble S, Wright G, McLennan D, Plunkett E. The English Indices of Deprivation  
37 2015 [Internet]. Department for Communities and Local Government. 2015 [cited 2019 Apr 12].  
38 Available from:  
39 [https://www.gov.uk/government/uploads/system/uploads/attachment\\_data/file/464485/English\\_Indices\\_of\\_Deprivation\\_2015\\_-\\_Technical-Report.pdf](https://www.gov.uk/government/uploads/system/uploads/attachment_data/file/464485/English_Indices_of_Deprivation_2015_-_Technical-Report.pdf)  
40  
41
- 42 24 Adams J, White M. Removing the health domain from the Index of Multiple Deprivation 2004—  
43 effect on measured inequalities in census measure of health. *J Public Health*. 2006;28(4):379-83.  
44
- 45 25 GP Patient Survey [Internet]. NHS England [cited 2019 Apr 12]. Available from: <https://gp-patient.co.uk/SurveysAndReports>  
46  
47
- 48 26 Friedman J. Greedy Function Approximation: A Gradient Boosting Machine. *Ann. Stat.* 2001;29(5):  
49 1189-1232.  
50
- 51 27 Olson RS, La Cava W, Mustahsan Z, Varik A, Moore JH. Data-driven Advice for Applying Machine  
52 Learning to Bioinformatics Problems. <https://arxiv.org/abs/1708.05070> [cited 2019 Dec 10]  
53
- 54 28 Wolters A, Robinson C, Hargreaves D, Pope R, Maconochie I, Deen, S, Steventon. Predictors of  
55 emergency department attendance following NHS 111 calls for children and young people: analysis of  
56 linked data. *BioRxiv*. 2018.  
57
- 58 29 Feverish illness in children, NICE clinical guideline 160 [Internet]. National Institute for Health and  
59 Care Excellence. 2013 May [cited 2019 Apr 12]. Available from:  
60

1  
2  
3  
4 [https://www.nice.org.uk/guidance/cg160/resources/support-for-education-and-learning-educational-](https://www.nice.org.uk/guidance/cg160/resources/support-for-education-and-learning-educational-resource-traffic-light-table-189985789)  
5 [resource-traffic-light-table-189985789](https://www.nice.org.uk/guidance/cg160/resources/support-for-education-and-learning-educational-resource-traffic-light-table-189985789)  
6  
7  
8  
9  
10  
11  
12  
13  
14  
15  
16  
17  
18  
19  
20  
21  
22  
23  
24  
25  
26  
27  
28  
29  
30  
31  
32  
33  
34  
35  
36  
37  
38  
39  
40  
41  
42  
43  
44  
45  
46  
47  
48  
49  
50  
51  
52  
53  
54  
55  
56  
57  
58  
59  
60

For peer review only

1  
2  
3  
4  
5  
6  
7  
8  
9  
10  
11  
12  
13  
14  
15  
16  
17  
18  
19  
20  
21  
22  
23  
24  
25  
26  
27  
28  
29  
30  
31  
32  
33  
34  
35  
36  
37  
38  
39  
40  
41  
42  
43  
44  
45  
46  
47  
48  
49  
50  
51  
52  
53  
54  
55  
56  
57  
58  
59  
60



Figure 1. How the outcome measure was coded.

564x480mm (72 x 72 DPI)

**Number of triaged 111 calls resulting in Type 1 ED attendance within 24 hours**

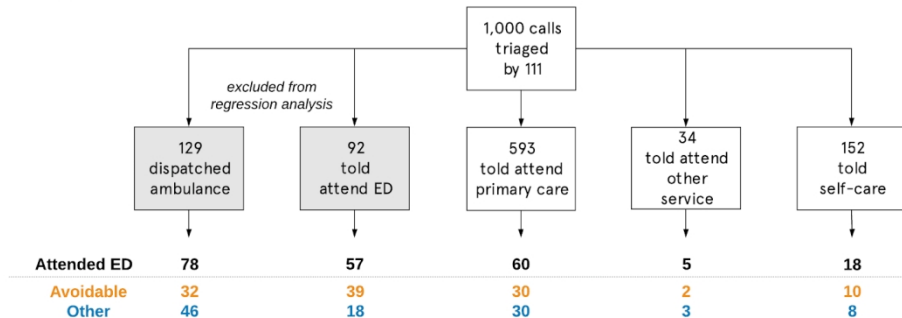

Figure 2. Outcomes of 16,563,946 calls made to 111 from March 2015 to October 2017. For ease of interpretation the total number of calls has been normalised to 1,000.

564x265mm (72 x 72 DPI)

## Supplement A: Derivation of figures reported in the Introduction

The 9.7 million figure includes only attendances with valid ED treatment records and includes attendances at both major consultant-led departments (Types 1 and 2) Minor Injury Units and Walk-in Centres (Types 3 and 4). The 50% figure is calculated by summing the rows "Guidance/advice only" and "None (consider guidance/advice option)" in Table 19 in <https://files.digital.nhs.uk/publication/e/7/acci-emer-atte-eng-2016-17-data.xlsx>. Similarly, Table 17 in the same dataset records that, among the 19.6 million attendances in 2016-17 with valid investigation records, the first investigation recorded for 8 million of them (41%) of them was 'None'.

The '£500 million' figure was obtained thus: ED attendances requiring "No investigation with no significant treatment" cost £57 each in 2016/17. Multiplying £57 by the 9,662,456 nonurgent attendances with valid ED treatment records in 2016/17 gives us a total of £551 million. Source for £57 figure is sheet "2016-17 A&E Tariff" in file "2017-18 A and E model" in Annex B of the 2017/18 and 2018/19 National Tariff Payment System documentation, available at <https://improvement.nhs.uk/resources/national-tariff-1719/>

**Table S1. Descriptive statistics for selected control variables.**

| Variable (min-max)                                                        | Observations | Mean (SD) / % |
|---------------------------------------------------------------------------|--------------|---------------|
| <b>Patient characteristics</b>                                            |              |               |
| Age (0-110)                                                               | 16,563,946   | 37.7 (27.9)   |
| Gender                                                                    | 16,563,946   | 100%          |
| <i>Male</i>                                                               | 7,003,057    | 42.3%         |
| <i>Female</i>                                                             | 9,560,889    | 57.7%         |
| IMD quintile (1-5)                                                        | 15,690,550   | 3.2 (1.4)     |
| Ratio distance of nearest hospital to nearest GP (0.4 - 44.6)             | 16,256,118   | 4.1 (2.4)     |
| Type of area                                                              | 15,707,810   | 100%          |
| <i>Urban</i>                                                              | 13,535,244   | 86.2%         |
| <i>Rural</i>                                                              | 2,172,566    | 13.8%         |
| Region                                                                    | 15,690,550   | 100%          |
| <i>North</i>                                                              | 5,822,600    | 37.1%         |
| <i>South &amp; East</i>                                                   | 2,144,612    | 13.7%         |
| <i>Midlands</i>                                                           | 5,129,125    | 32.7%         |
| <i>London</i>                                                             | 2,594,213    | 16.5%         |
| <b>GP practice characteristics</b>                                        |              |               |
| % patients typically able to get an appointment per practice (39.9%-100%) | 15,629,833   | 84.0%         |
| Number of FTEs per practice (0.02-34.1)                                   | 14,877,337   | 5.6 (3.7)     |
| <b>Call characteristics</b>                                               |              |               |
| Call had clinical input (yes=1, no=0)                                     | 16,563,946   | 21.6%         |
| Call duration in minutes (0-189.7)                                        | 16,563,946   | 15.4 (22.6)   |

**STROBE 2007 (v4) checklist of items to be included in reports of observational studies in epidemiology\***  
**Checklist for cohort, case-control, and cross-sectional studies (combined)**

| Section/Topic             | Item # | Recommendation                                                                                                                                                                                                                                                                                                                                                                                                                                                         | Reported on page # |
|---------------------------|--------|------------------------------------------------------------------------------------------------------------------------------------------------------------------------------------------------------------------------------------------------------------------------------------------------------------------------------------------------------------------------------------------------------------------------------------------------------------------------|--------------------|
| Title and abstract        | 1      | (a) Indicate the study’s design with a commonly used term in the title or the abstract                                                                                                                                                                                                                                                                                                                                                                                 | 1                  |
|                           |        | (b) Provide in the abstract an informative and balanced summary of what was done and what was found                                                                                                                                                                                                                                                                                                                                                                    | 1                  |
| <b>Introduction</b>       |        |                                                                                                                                                                                                                                                                                                                                                                                                                                                                        |                    |
| Background/rationale      | 2      | Explain the scientific background and rationale for the investigation being reported                                                                                                                                                                                                                                                                                                                                                                                   | 2                  |
| Objectives                | 3      | State specific objectives, including any pre-specified hypotheses                                                                                                                                                                                                                                                                                                                                                                                                      | 3                  |
| <b>Methods</b>            |        |                                                                                                                                                                                                                                                                                                                                                                                                                                                                        |                    |
| Study design              | 4      | Present key elements of study design early in the paper                                                                                                                                                                                                                                                                                                                                                                                                                | 3                  |
| Setting                   | 5      | Describe the setting, locations, and relevant dates, including periods of recruitment, exposure, follow-up, and data collection                                                                                                                                                                                                                                                                                                                                        | 3                  |
| Participants              | 6      | (a) <i>Cohort study</i> —Give the eligibility criteria, and the sources and methods of selection of participants. Describe methods of follow-up<br><i>Case-control study</i> —Give the eligibility criteria, and the sources and methods of case ascertainment and control selection. Give the rationale for the choice of cases and controls<br><i>Cross-sectional study</i> —Give the eligibility criteria, and the sources and methods of selection of participants | 4                  |
|                           |        | (b) <i>Cohort study</i> —For matched studies, give matching criteria and number of exposed and unexposed<br><i>Case-control study</i> —For matched studies, give matching criteria and the number of controls per case                                                                                                                                                                                                                                                 |                    |
| Variables                 | 7      | Clearly define all outcomes, exposures, predictors, potential confounders, and effect modifiers. Give diagnostic criteria, if applicable                                                                                                                                                                                                                                                                                                                               | 4                  |
| Data sources/ measurement | 8*     | For each variable of interest, give sources of data and details of methods of assessment (measurement). Describe comparability of assessment methods if there is more than one group                                                                                                                                                                                                                                                                                   | 5, 6               |
| Bias                      | 9      | Describe any efforts to address potential sources of bias                                                                                                                                                                                                                                                                                                                                                                                                              | 4                  |
| Study size                | 10     | Explain how the study size was arrived at                                                                                                                                                                                                                                                                                                                                                                                                                              | 3, 4               |
| Quantitative variables    | 11     | Explain how quantitative variables were handled in the analyses. If applicable, describe which groupings were chosen and why                                                                                                                                                                                                                                                                                                                                           | 6                  |
| Statistical methods       | 12     | (a) Describe all statistical methods, including those used to control for confounding                                                                                                                                                                                                                                                                                                                                                                                  | 7, 9               |
|                           |        | (b) Describe any methods used to examine subgroups and interactions                                                                                                                                                                                                                                                                                                                                                                                                    | 9                  |
|                           |        | (c) Explain how missing data were addressed                                                                                                                                                                                                                                                                                                                                                                                                                            | 4                  |
|                           |        | (d) <i>Cohort study</i> —If applicable, explain how loss to follow-up was addressed<br><i>Case-control study</i> —If applicable, explain how matching of cases and controls was addressed                                                                                                                                                                                                                                                                              | -                  |



|                          |     |                                                                                                                                                                                                              |          |
|--------------------------|-----|--------------------------------------------------------------------------------------------------------------------------------------------------------------------------------------------------------------|----------|
|                          |     | <i>Cross-sectional study</i> —If applicable, describe analytical methods taking account of sampling strategy                                                                                                 |          |
|                          |     | (e) Describe any sensitivity analyses                                                                                                                                                                        | -        |
| <b>Results</b>           |     |                                                                                                                                                                                                              |          |
| Participants             | 13* | (a) Report numbers of individuals at each stage of study—eg numbers potentially eligible, examined for eligibility, confirmed eligible, included in the study, completing follow-up, and analysed            | 4        |
|                          |     | (b) Give reasons for non-participation at each stage                                                                                                                                                         | -        |
|                          |     | (c) Consider use of a flow diagram                                                                                                                                                                           | 5        |
| Descriptive data         | 14* | (a) Give characteristics of study participants (eg demographic, clinical, social) and information on exposures and potential confounders                                                                     | Table S1 |
|                          |     | (b) Indicate number of participants with missing data for each variable of interest                                                                                                                          | Table S1 |
|                          |     | (c) <i>Cohort study</i> —Summarise follow-up time (eg, average and total amount)                                                                                                                             | -        |
| Outcome data             | 15* | <i>Cohort study</i> —Report numbers of outcome events or summary measures over time                                                                                                                          |          |
|                          |     | <i>Case-control study</i> —Report numbers in each exposure category, or summary measures of exposure                                                                                                         |          |
|                          |     | <i>Cross-sectional study</i> —Report numbers of outcome events or summary measures                                                                                                                           | 7        |
| Main results             | 16  | (a) Give unadjusted estimates and, if applicable, confounder-adjusted estimates and their precision (eg, 95% confidence interval). Make clear which confounders were adjusted for and why they were included | 7        |
|                          |     | (b) Report category boundaries when continuous variables were categorized                                                                                                                                    | 8        |
|                          |     | (c) If relevant, consider translating estimates of relative risk into absolute risk for a meaningful time period                                                                                             | 8        |
| Other analyses           | 17  | Report other analyses done—eg analyses of subgroups and interactions, and sensitivity analyses                                                                                                               | 9-11     |
| <b>Discussion</b>        |     |                                                                                                                                                                                                              |          |
| Key results              | 18  | Summarise key results with reference to study objectives                                                                                                                                                     | 11       |
| Limitations              | 19  | Discuss limitations of the study, taking into account sources of potential bias or imprecision. Discuss both direction and magnitude of any potential bias                                                   | 12       |
| Interpretation           | 20  | Give a cautious overall interpretation of results considering objectives, limitations, multiplicity of analyses, results from similar studies, and other relevant evidence                                   | 12       |
| Generalisability         | 21  | Discuss the generalisability (external validity) of the study results                                                                                                                                        | 13       |
| <b>Other information</b> |     |                                                                                                                                                                                                              |          |
| Funding                  | 22  | Give the source of funding and the role of the funders for the present study and, if applicable, for the original study on which the present article is based                                                | 14       |

\*Give information separately for cases and controls in case-control studies and, if applicable, for exposed and unexposed groups in cohort and cross-sectional studies.

**Note:** An Explanation and Elaboration article discusses each checklist item and gives methodological background and published examples of transparent reporting. The STROBE checklist is best used in conjunction with this article (freely available on the Web sites of PLoS Medicine at <http://www.plosmedicine.org/>, Annals of Internal Medicine at <http://www.annals.org/>, and Epidemiology at <http://www.epidem.com/>). Information on the STROBE Initiative is available at [www.strobe-statement.org](http://www.strobe-statement.org).
