# Supplementary material for: Identifying the predictors of avoidable emergency department attendance after contact with the NHS 111 phone service: analysis of 16.6 million calls to 111 in England in 2015–2017
Source: PubMed Central journal article supplement — BMJ Open. 2020 Mar 9;10(3):e032043. doi: 10.1136/bmjopen-2019-032043 (PMC7066618; doi:10.1136/bmjopen-2019-032043), 2020-03-09
Supplement: bmjopen-2019-032043supp001.pdf [file bmjopen-2019-032043supp001.pdf]

### Supplement A: Derivation of figures reported in the Introduction

The 9.7 million figure includes only attendances with valid ED treatment records and includes attendances at both major consultant-led departments (Types 1 and 2) Minor Injury Units and Walk-in Centres (Types 3 and 4). The 50% figure is calculated by summing the rows "Guidance/advice only" and "None (consider guidance/advice option)" in Table 19 in <https://files.digital.nhs.uk/publication/e/7/acci-emer-atte-eng-2016-17-data.xlsx>. Similarly, Table 17 in the same dataset records that, among the 19.6 million attendances in 2016-17 with valid investigation records, the first investigation recorded for 8 million of them (41%) of them was 'None'.

The '£500 million' figure was obtained thus: ED attendances requiring "No investigation with no significant treatment" cost £57 each in 2016/17. Multiplying £57 by the 9,662,456 nonurgent attendances with valid ED treatment records in 2016/17 gives us a total of £551 million. Source for £57 figure is sheet "2016-17 A&E Tariff" in file "2017-18 A and E model" in Annex B of the 2017/18 and 2018/19 National Tariff Payment System documentation, available at <https://improvement.nhs.uk/resources/national-tariff-1719/>
