# Supplementary material for: Identifying the predictors of avoidable emergency department attendance after contact with the NHS 111 phone service: analysis of 16.6 million calls to 111 in England in 2015–2017
Source: PubMed Central journal article supplement — BMJ Open. 2020 Mar 9;10(3):e032043. doi: 10.1136/bmjopen-2019-032043 (PMC7066618; doi:10.1136/bmjopen-2019-032043), 2020-03-09
Supplement: bmjopen-2019-032043supp002.pdf [file bmjopen-2019-032043supp002.pdf]

**Table S1. Descriptive statistics for selected control variables.**

| Variable (min-max)                                                        | Observations | Mean (SD) / % |
|---------------------------------------------------------------------------|--------------|---------------|
| <b>Patient characteristics</b>                                            |              |               |
| Age (0-110)                                                               | 16,563,946   | 37.7 (27.9)   |
| Gender                                                                    | 16,563,946   | 100%          |
| <i>Male</i>                                                               | 7,003,057    | 42.3%         |
| <i>Female</i>                                                             | 9,560,889    | 57.7%         |
| IMD quintile (1-5)                                                        | 15,690,550   | 3.2 (1.4)     |
| Ratio distance of nearest hospital to nearest GP (0.4 - 44.6)             | 16,256,118   | 4.1 (2.4)     |
| Type of area                                                              | 15,707,810   | 100%          |
| <i>Urban</i>                                                              | 13,535,244   | 86.2%         |
| <i>Rural</i>                                                              | 2,172,566    | 13.8%         |
| Region                                                                    | 15,690,550   | 100%          |
| <i>North</i>                                                              | 5,822,600    | 37.1%         |
| <i>South &amp; East</i>                                                   | 2,144,612    | 13.7%         |
| <i>Midlands</i>                                                           | 5,129,125    | 32.7%         |
| <i>London</i>                                                             | 2,594,213    | 16.5%         |
| <b>GP practice characteristics</b>                                        |              |               |
| % patients typically able to get an appointment per practice (39.9%-100%) | 15,629,833   | 84.0%         |
| Number of FTEs per practice (0.02-34.1)                                   | 14,877,337   | 5.6 (3.7)     |
| <b>Call characteristics</b>                                               |              |               |
| Call had clinical input (yes=1, no=0)                                     | 16,563,946   | 21.6%         |
| Call duration in minutes (0-189.7)                                        | 16,563,946   | 15.4 (22.6)   |
